# Supplementary material for: On Integral INICS Aromaticity of Pyridodiazepine Constitutional Isomers and Tautomers
Source: MDPI journal article supplement (doi:10.3390/molecules28155684), 2023-07-27
Supplement: s1 [file s1]

# Supplementary Materials to

## On integral NICS aromaticity of pyridodiazepine constitutional isomers and tautomers

Małgorzata Jarończyk<sup>1,\*</sup>, Sławomir Ostrowski<sup>2</sup>, and Jan Cz. Dobrowolski<sup>1,2,\*</sup>

<sup>1</sup>National Medicines Institute, 30/34 Chełmska Street, 00-725 Warsaw, Poland

<sup>2</sup>Institute of Chemistry and Nuclear Technology, 16 Dorodna Street, 03-195 Warsaw, Poland;  
s.ostrowski@ichtj.waw.pl

\*Correspondence: m.jaronczyk@nil.gov.pl (M.J.); j.dobrowolski@nil.gov.pl (J.C.D.)

|            | CONTENT                                                                                                                                                                                                                                    | PAGE |
|------------|--------------------------------------------------------------------------------------------------------------------------------------------------------------------------------------------------------------------------------------------|------|
| Table S1   | Energy and relative Gibbs free energies of pyrido[1,n]diazepines n=2,3,4,5                                                                                                                                                                 | 2    |
| Table S2   | Energy and relative Gibbs free energies of pyrido[2,n]diazepines n=3,4                                                                                                                                                                     | 3    |
| Table S3   | The energies and energy differences $\Delta E$ (kcal/mol) referred to <b>the most stable diazepine type isomers of pyrido[m,n]diazepines</b> calculated using different functionals: B3LYP, CAM-B3LYP, BHandHLYP                           | 4    |
| Table S4   | The energies and energy differences $\Delta E$ (kcal/mol) referred to <b>the globally most stable isomer of pyrido[m,n]diazepines</b> calculated using different functionals: B3LYP, CAM-B3LYP, BHandHLYP                                  | 5    |
| Table S5   | The energies and Gibbs free energy differences $\Delta G$ (kcal/mol) referred to <b>the most stable diazepine type isomers of pyrido[m,n]diazepines</b> calculated using different functionals: B3LYP, CAM-B3LYP, BHandHLYP                | 6    |
| Figure S1  | The correlations between energy differences $\Delta E$ (kcal/mol) of pyrido[m,n]diazepines calculated using the B3LYP, CAM-B3LYP, and BHandHLYP functionals                                                                                | 7    |
| Figure S2  | The correlations between relative (a) energy $\Delta E$ and (b) relative Gibbs free energy $\Delta G$ (kcal/mol) of pyrido[m,n]diazepines estimated using the B3LYP/cc-pVTZ method in the gas phase and water simulated using a PCM model. | 8    |
| Figure S3  | The correlations between NICS parameters of rings in pyrido[m,n]diazepines estimated using the B3LYP/cc-pVTZ method in the gas phase and water simulated using a PCM model                                                                 | 8    |
| Figure S4  | The NICS <sub>zz</sub> -scans vs. distance from the ring center along the normal to the ring for the pyrido[1,2]diazepines                                                                                                                 | 9    |
| Figure S5  | The NICS <sub>zz</sub> -scans vs. distance from the ring center along the normal to the ring for the pyrido[1,3]diazepines                                                                                                                 | 10   |
| Figure S6  | The NICS <sub>zz</sub> -scans vs. distance from the ring center along the normal to the ring for the pyrido[1,4]diazepines                                                                                                                 | 11   |
| Figure S7  | The NICS <sub>zz</sub> -scans vs. distance from the ring center along the normal to the ring for the pyrido[1,5]diazepines                                                                                                                 | 12   |
| Figure S8  | The NICS <sub>zz</sub> -scans vs. distance from the ring center along the normal to the ring for the pyrido[2,3]diazepines                                                                                                                 | 13   |
| Figure S9  | The NICS <sub>zz</sub> -scans vs. distance from the ring center along the normal to the ring for the pyrido[2,4]diazepines                                                                                                                 | 14   |
| Figure S10 | The NICS curves taken for the normal straight lines through different points of the benzene plane.                                                                                                                                         | 15   |
| Table S6   | Different NICS aromaticity indices of ring in pyrido[1,2]diazepines in the gas phase.                                                                                                                                                      | 16   |
| Table S7   | Different NICS aromaticity indices of ring in pyrido[1,3]diazepines in the gas phase.                                                                                                                                                      | 17   |
| Table S8   | Different NICS aromaticity indices of ring in pyrido[1,4]diazepines in the gas phase.                                                                                                                                                      | 18   |
| Table S9   | Different NICS aromaticity indices of ring in pyrido[1,5]diazepines in the gas phase.                                                                                                                                                      | 19   |
| Table S10  | Different NICS aromaticity indices of ring in pyrido[2,3]diazepines in the gas phase.                                                                                                                                                      | 20   |
| Table S11  | Different NICS aromaticity indices of ring in pyrido[2,4]diazepines in the gas phase.                                                                                                                                                      | 21   |
| Table S12  | Different NICS aromaticity indices of ring in pyrido[1,2]diazepines in the water phase.                                                                                                                                                    | 22   |
| Table S13  | Different NICS aromaticity indices of ring in pyrido[1,3]diazepines in the water phase.                                                                                                                                                    | 23   |
| Table S14  | Different NICS aromaticity indices of ring in pyrido[1,4]diazepines in the water phase.                                                                                                                                                    | 24   |
| Table S15  | Different NICS aromaticity indices of ring in pyrido[1,5]diazepines in the water phase.                                                                                                                                                    | 25   |
| Table S16  | Different NICS aromaticity indices of ring in pyrido[2,3]diazepines in the water phase.                                                                                                                                                    | 26   |
| Table S17  | Different NICS aromaticity indices of ring in pyrido[2,4]diazepines in the water phase.                                                                                                                                                    | 27   |

**Table S1.** The energy and relative Gibbs free energies E, G (hartree) are referred to respectively by the most stable isomer of pyrido[1,n]diazepines n=2,3,4,5 pyridine condensation (PC) in a given diazepine type (DT), tautomer type (T) in particular types of pyridine condensation, and planarity (P) bicyclic system of np (non-planar) and p and (planar) tautomers.

|                       | PC | T    | P | E <sub>T</sub> | G <sub>T</sub> |                       | PC | T    | P | E <sub>T</sub> | G <sub>T</sub> |
|-----------------------|----|------|---|----------------|----------------|-----------------------|----|------|---|----------------|----------------|
| pyrido[1,2]diazepines | N6 | N1-H | n | -473.419641    | -473.312429    | pyrido[1,4]diazepines | N6 | N1-H | n | -473.436405    | -473.329775    |
|                       |    | N2-H | n | -473.388340    | -473.282096    |                       |    | N4-H | n | -473.404559    | -473.298856    |
|                       |    | N2-H | p | -473.384443    | -473.278351    |                       |    | N6-H | n | -473.406722    | -473.302422    |
|                       |    | N6-H | n | -473.361958    | -473.257394    |                       |    | N1-H | n | -473.439271    | -473.332369    |
|                       | N7 | N1-H | n | -473.420807    | -473.313502    |                       | N7 | N4-H | p | -473.406786    | -473.301270    |
|                       |    | N2-H | n | -473.390696    | -473.283807    |                       |    | N4-H | n | -473.407080    | -473.301271    |
|                       |    | N7-H | n | -473.385048    | -473.279509    |                       |    | N7-H | n | -473.415294    | -473.309469    |
|                       | N8 | N1-H | n | -473.417710    | -473.310392    |                       | N8 | N1-H | n | -473.435263    | -473.328464    |
|                       |    | N2-H | p | -473.386324    | -473.279876    |                       |    | N4-H | n | -473.398830    | -473.293337    |
|                       |    | N2-H | n | -473.380159    | -473.274226    |                       |    | N8-H | p | -473.404896    | -473.300784    |
|                       |    | N8-H | n | -473.373586    | -473.268337    |                       |    | N1-H | n | -473.447418    | -473.340341    |
|                       | N9 | N1-H | n | -473.427552    | -473.320232    |                       | N9 | N4-H | n | -473.403441    | -473.297897    |
|                       |    | N2-H | p | -473.386736    | -473.280792    |                       |    | N9-H | p | -473.426656    | -473.321178    |
|                       |    | N2-H | n | -473.381807    | -473.275960    |                       |    | N1-H | n | -473.438714    | -473.332136    |
|                       |    | N9-H | n | -473.393962    | -473.289404    |                       | N6 | N5-H | n | -473.451552    | -473.344459    |
| pyrido[1,3]diazepines | N6 | N1-H | n | -473.450275    | -473.343002    |                       |    | N6-H | p | -473.432992    | -473.327217    |
|                       |    | N3-H | n | -473.451104    | -473.345928    |                       | N7 | N1-H | n | -473.441778    | -473.335026    |
|                       |    | N6-H | n | -473.424826    | -473.319000    |                       |    | N5-H | n | -473.440851    | -473.333982    |
|                       | N7 | N1-H | n | -473.448427    | -473.341208    |                       |    | N7-H | p | -473.420768    | -473.315713    |
|                       |    | N3-H | n | -473.450125    | -473.343989    |                       | N8 | N1-H | p | -473.440851    | -473.333982    |
|                       |    | N7-H | n | -473.421496    | -473.315538    |                       |    | N5-H | n | -473.4417778   | -473.335026    |
|                       | N8 | N1-H | n | -473.459200    | -473.351702    |                       |    | N8-H | p | -473.4207675   | -473.315713    |
|                       |    | N3-H | n | -473.449486    | -473.342735    |                       | N9 | N1-H | n | -473.4515516   | -473.344459    |
|                       |    | N8-H | n | -473.439059    | -473.332658    |                       |    | N5-H | n | -473.4387136   | -473.332136    |
|                       | N9 | N1-H | n | -473.450275    | -473.343002    |                       |    | N9-H | n | -473.432992    | -473.327217    |
|                       |    | N3-H | n | -473.451104    | -473.345928    |                       |    |      |   |                |                |
|                       |    | N9-H | n | -473.424826    | -473.319000    |                       |    |      |   |                |                |

**Table S2.** The energy and relative Gibbs free energies E, G (hartree) are referred to respectively by the most stable isomer of pyrido[2,n]diazepines n=3,4, pyridine condensation (PC) in a given diazepine type (DT), tautomer type (T) in particular types of pyridine condensation, and planarity (P) bicyclic system of np (non-planar) and p and (planar) tautomers.

|                       | PC | T    | P | E <sub>T</sub> | G <sub>T</sub>     |                       | PC | T    | P | E <sub>T</sub> | G <sub>T</sub>     |
|-----------------------|----|------|---|----------------|--------------------|-----------------------|----|------|---|----------------|--------------------|
| pyrido[2,3]diazepines |    | N2-H | p | -473.392485    | -473.285646        | pyrido[2,4]diazepines |    | N2-H | p | -473.400382    | -473.295595        |
|                       |    | N3-H | n | -473.422189    | <b>-473.315340</b> |                       |    | N4-H | n | -473.402939    | -473.297486        |
|                       | N6 | N6-H | n | -473.387289    | -473.281632        |                       | N6 | N6-H | p | -473.409271    | <b>-473.304237</b> |
|                       |    | N2-H | p | -473.390241    | -473.283079        |                       |    | N2-H | p | -473.401947    | -473.296579        |
|                       |    | N3-H | n | -473.419272    | <b>-473.312509</b> |                       |    | N4-H | p | -473.399583    | -473.294084        |
|                       | N7 | N7-H | n | -473.371283    | -473.266463        |                       | N7 | N7-H | n | -473.409555    | <b>-473.304151</b> |
|                       |    | N2-H | n | -473.393320    | <b>-473.286276</b> |                       |    | N2-H | p | -473.399583    | -473.294084        |
|                       |    | N3-H | p | -473.390241    | -473.283079        |                       |    | N4-H | p | -473.401947    | -473.296579        |
|                       | N8 | N8-H | n | -473.386042    | -473.280282        |                       | N8 | N8-H | n | -473.409555    | <b>-473.304151</b> |
|                       |    | N2-H | n | -473.393804    | <b>-473.286833</b> |                       |    | N2-H | n | -473.402939    | -473.297486        |
|                       |    | N3-H | p | -473.392485    | -473.285646        |                       |    | N4-H | p | -473.400382    | -473.295594        |
|                       | N9 | N9-H | p | -473.375663    | -473.271364        |                       | N9 | N9-H | p | -473.409271    | <b>-473.304237</b> |

**Table S3.** The energies and energy differences  $\Delta E$  (kcal/mol) referred to **the most stable diazepine type isomers of pyrido[m,n]diazepines** (m=1, n=2-5; m=2, n=3,4) calculated using different functionals: B3LYP, CAM-B3LYP, BHandHLYP where PC denotes pyridine condensation type, DT is a given diazepine type, and T is tautomer type.

|                       |           | PC (T)      | E <sub>B3LYP</sub> | E <sub>CAM-B3LYP</sub> | E <sub>BHANDHLYP</sub> | ΔE <sub>B3LYP</sub> | ΔE <sub>CAM-B3LYP</sub> | ΔE <sub>BHANDHLYP</sub> |
|-----------------------|-----------|-------------|--------------------|------------------------|------------------------|---------------------|-------------------------|-------------------------|
| pyrido[m,n]diazepines | [1,2]     | N6 (N1-H)   | -473.419641        | -473.171227            | -473.127105            | 4.96                | 5.02                    | 5.11                    |
|                       |           | N7 (N1-H)   | -473.420807        | -473.172269            | -473.128558            | 4.23                | 4.36                    | 4.20                    |
|                       |           | N8 (N1-H)   | -473.417710        | -473.169223            | -473.125086            | 6.18                | 6.28                    | 6.38                    |
|                       |           | N9 (N1-H)   | -473.427552        | -473.179218            | -473.135250            | 0.00                | 0.00                    | 0.00                    |
|                       | [1,3]     | N6 (N3-H)   | -473.452077        | -473.204180            | -473.161695            | 4.47                | 4.70                    | 4.65                    |
|                       |           | N7 (N3-H)   | -473.451104        | -473.202995            | -473.160864            | 5.08                | 5.44                    | 5.17                    |
|                       |           | N8 (N3-H)   | -473.450125        | -473.201984            | -473.159727            | 5.70                | 6.08                    | 5.89                    |
|                       |           | N9 (N1-H)   | -473.459200        | -473.211664            | -473.169104            | 0.00                | 0.00                    | 0.00                    |
|                       | [1,4]     | N6 (N1-H)   | -473.436405        | -473.188698            | -473.145465            | 6.91                | 7.02                    | 7.27                    |
|                       |           | N7 (N1-H)   | -473.439271        | -473.191601            | -473.149041            | 5.11                | 5.20                    | 5.03                    |
|                       |           | N8 (N1-H)   | -473.435263        | -473.187361            | -473.144093            | 7.63                | 7.86                    | 8.13                    |
|                       |           | N9 (N1-H)   | -473.447418        | -473.199876            | -473.157046            | 0.00                | 0.00                    | 0.00                    |
|                       | [1,5]     | N7 (N1-H)   | -473.441778        | -473.193738            | -473.151037            | 6.13                | 6.26                    | 6.09                    |
|                       |           | N6 (N5-H)   | -473.451552        | -473.203705            | -473.160728            | 0.00                | 0.00                    | 0.00                    |
|                       | [2,3]     | N8 (N2-H)   | -473.393320        | -473.139363            | -473.094474            | 18.12               | 21.33                   | 21.97                   |
|                       |           | N9 (N2-H)   | -473.393804        | -473.139996            | -473.093968            | 17.81               | 20.93                   | 22.29                   |
| N6 (N3-H)             |           | -473.422189 | -473.173327        | -473.129460            | 0.00                   | 0.00                | 0.00                    |                         |
| N7 (N3-H)             |           | -473.419272 | -473.170238        | -473.126223            | 1.83                   | 1.94                | 2.03                    |                         |
| [2,4]                 | N6 (N6-H) | -473.409555 | -473.159539        | -473.116171            | 0.00                   | 0.00                | 0.00                    |                         |
|                       | N7 (N7-H) | -473.409271 | -473.158621        | -473.114561            | 0.18                   | 0.58                | 1.01                    |                         |

**Table S4.** The energies and energy differences  $\Delta E$  (kcal/mol) referred to **the globally most stable isomer of pyrido[m,n]diazepines** ( $m=1, n=2-5$ ;  $m=2, n=3,4$ ) calculated using different functionals: B3LYP, CAM-B3LYP, BHandHLYP where PC denotes pyridine condensation type, DT is a given diazepine type, and T is tautomer type.

|                       |       | PC (T)    | E <sub>B3LYP</sub> | E <sub>CAM-B3LYP</sub> | E <sub>BHandHLYP</sub> | $\Delta E_{B3LYP}$ | $\Delta E_{CAM-B3LYP}$ | $\Delta E_{BHandHLYP}$ |
|-----------------------|-------|-----------|--------------------|------------------------|------------------------|--------------------|------------------------|------------------------|
| pyrido[m,n]diazepines | [1,2] | N6 (N1-H) | -473.419641        | -473.171227            | -473.127105            | 24.84              | 25.39                  | 26.37                  |
|                       |       | N7 (N1-H) | -473.420807        | -473.172269            | -473.128558            | 24.11              | 24.74                  | 25.46                  |
|                       |       | N8 (N1-H) | -473.417710        | -473.169223            | -473.125086            | 26.05              | 26.65                  | 27.64                  |
|                       |       | N9 (N1-H) | -473.427552        | -473.179218            | -473.135250            | 19.87              | 20.37                  | 21.26                  |
|                       | [1,3] | N6 (N3-H) | -473.452077        | -473.204180            | -473.161695            | 4.47               | 4.70                   | 4.65                   |
|                       |       | N7 (N3-H) | -473.451104        | -473.202995            | -473.160864            | 5.08               | 5.44                   | 5.17                   |
|                       |       | N8 (N3-H) | -473.450125        | -473.201984            | -473.159727            | 5.70               | 6.08                   | 5.89                   |
|                       |       | N9 (N1-H) | <b>-473.459200</b> | <b>-473.211664</b>     | <b>-473.169104</b>     | 0.00               | 0.00                   | 0.00                   |
|                       | [1,4] | N6 (N1-H) | -473.436405        | -473.188698            | -473.145465            | 14.31              | 14.42                  | 14.84                  |
|                       |       | N7 (N1-H) | -473.439271        | -473.191601            | -473.149041            | 12.51              | 12.60                  | 12.60                  |
|                       |       | N8 (N1-H) | -473.435263        | -473.187361            | -473.144093            | 15.03              | 15.26                  | 15.70                  |
|                       |       | N9 (N1-H) | -473.447418        | -473.199876            | -473.157046            | 7.40               | 7.40                   | 7.57                   |
|                       | [1,5] | N7 (N1-H) | -473.441778        | -473.193738            | -473.151037            | 10.94              | 11.26                  | 11.34                  |
|                       |       | N6 (N5-H) | -473.451552        | -473.203705            | -473.160728            | 4.80               | 5.00                   | 5.26                   |
|                       |       | N8 (N2-H) | -473.393320        | -473.139363            | -473.094474            | 41.37              | 45.40                  | 46.86                  |
|                       |       | N9 (N2-H) | -473.393804        | -473.139996            | -473.093968            | 41.06              | 45.00                  | 47.18                  |
|                       | [2,3] | N6 (N3-H) | -473.422189        | -473.173327            | -473.129460            | 23.24              | 24.07                  | 24.89                  |
|                       |       | N7 (N3-H) | -473.419272        | -473.170238            | -473.126223            | 25.07              | 26.01                  | 26.93                  |
|                       | [2,4] | N6 (N6-H) | -473.409555        | -473.159539            | -473.116171            | 31.17              | 32.73                  | 33.24                  |
|                       |       | N7 (N7-H) | -473.409271        | -473.158621            | -473.114561            | 31.35              | 33.31                  | 34.25                  |

**Table S5.** The energies and Gibbs free energy differences  $\Delta G$  (kcal/mol) referred to **the most stable diazepine type isomers of pyrido[m,n]diazepines** ( $m=1$ ,  $n=2-5$ ;  $m=2$ ,  $n=3,4$ ) calculated using different functionals: B3LYP, CAM-B3LYP, BHandHLYP where PC denotes pyridine condensation type, DT is a given diazepine type, and T is tautomer type.

|                       |           | PC (T)      | G <sub>B3LYP</sub> | G <sub>CAM-B3LYP</sub> | G <sub>BHANDHLYP</sub> | ΔG <sub>B3LYP</sub> | ΔG <sub>CAM-B3LYP</sub> | ΔG <sub>BHANDHLYP</sub> |
|-----------------------|-----------|-------------|--------------------|------------------------|------------------------|---------------------|-------------------------|-------------------------|
| pyrido[m,n]diazepines | [1,2]     | N6 (N1-H)   | -473.312429        | -473.061766            | -473.013838            | 4.90                | 4.96                    | 5.07                    |
|                       |           | N7 (N1-H)   | -473.313502        | -473.062732            | -473.015210            | 4.22                | 4.35                    | 4.21                    |
|                       |           | N8 (N1-H)   | -473.310392        | -473.059663            | -473.011708            | 6.17                | 6.28                    | 6.40                    |
|                       |           | N9 (N1-H)   | -473.320232        | -473.069669            | -473.021914            | 0.00                | 0.00                    | 0.00                    |
|                       | [1,3]     | N6 (N3-H)   | -473.345550        | -473.095304            | -473.049267            | 3.86                | 4.20                    | 4.06                    |
|                       |           | N7 (N3-H)   | -473.345928        | -473.094290            | -473.049023            | 3.62                | 4.83                    | 4.21                    |
|                       |           | N8 (N3-H)   | -473.343989        | -473.093202            | -473.047516            | 4.84                | 5.51                    | 5.16                    |
|                       |           | N9 (N1-H)   | -473.351702        | -473.101990            | -473.055739            | 0.00                | 0.00                    | 0.00                    |
|                       | [1,4]     | N6 (N1-H)   | -473.329775        | -473.079793            | -473.032812            | 6.63                | 6.77                    | 7.04                    |
|                       |           | N7 (N1-H)   | -473.332369        | -473.082459            | -473.036154            | 5.00                | 5.10                    | 4.94                    |
|                       |           | N8 (N1-H)   | -473.328464        | -473.078314            | -473.031289            | 7.45                | 7.70                    | 7.99                    |
|                       |           | N9 (N1-H)   | -473.340341        | -473.090583            | -473.044024            | 0.00                | 0.00                    | 0.00                    |
|                       | [1,5]     | N7 (N1-H)   | -473.335026        | -473.084753            | -473.038400            | 5.92                | 6.08                    | 5.91                    |
|                       |           | N6 (N5-H)   | -473.344459        | -473.094438            | -473.047822            | 0.00                | 0.00                    | 0.00                    |
|                       | [2,3]     | N8 (N2-H)   | -473.286276        | -473.030315            | -472.981812            | 18.24               | 21.30                   | 21.86                   |
|                       |           | N9 (N2-H)   | -473.286833        | -473.031009            | -472.981195            | 17.89               | 20.87                   | 22.24                   |
| N6 (N3-H)             |           | -473.315340 | -473.064263        | -473.016641            | 0.00                   | 0.00                | 0.00                    |                         |
| N7 (N3-H)             |           | -473.312509 | -473.061219        | -473.013424            | 1.78                   | 1.91                | 2.02                    |                         |
| [2,4]                 | N6 (N6-H) | -473.304151 | -473.051738        | -473.004704            | 0.05                   | 0.00                | 0.00                    |                         |
|                       | N7 (N7-H) | -473.304237 | -473.051152        | -473.003576            | 0.00                   | 0.37                | 0.71                    |                         |

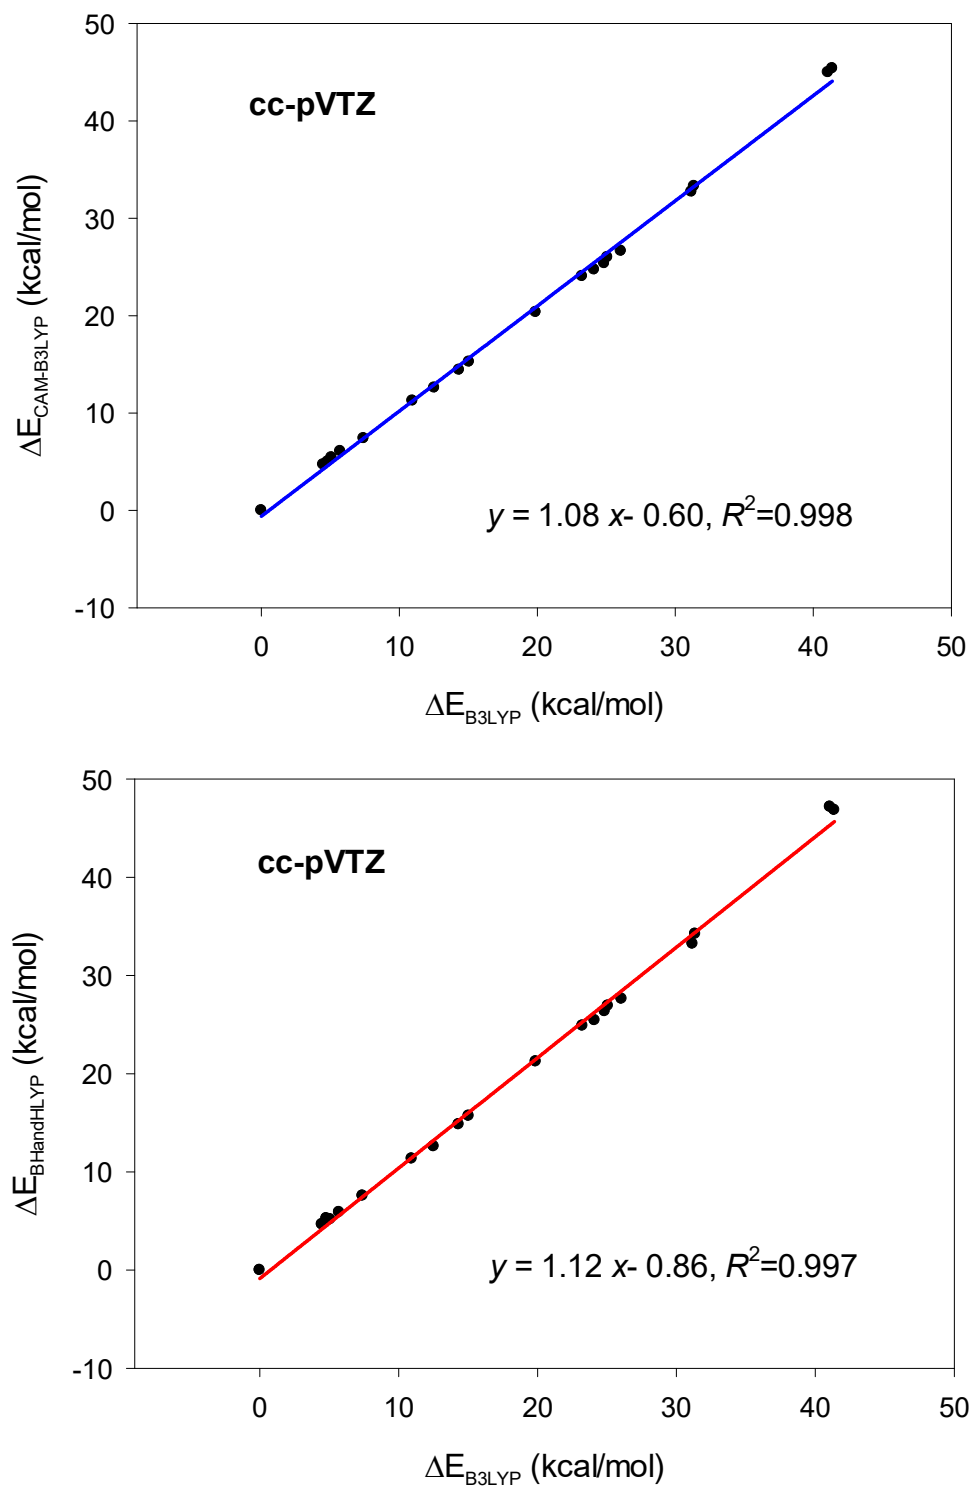

**Figure S1.** The correlations between energy differences  $\Delta E$  (kcal/mol) of pyrido[m,n]diazepines ( $m=1$ ,  $n=2-5$ ;  $m=2$ ,  $n=3,4$ ) calculated using the B3LYP, CAM-B3LYP, and BHandHLYP functionals and the same cc-pVTZ basis set.

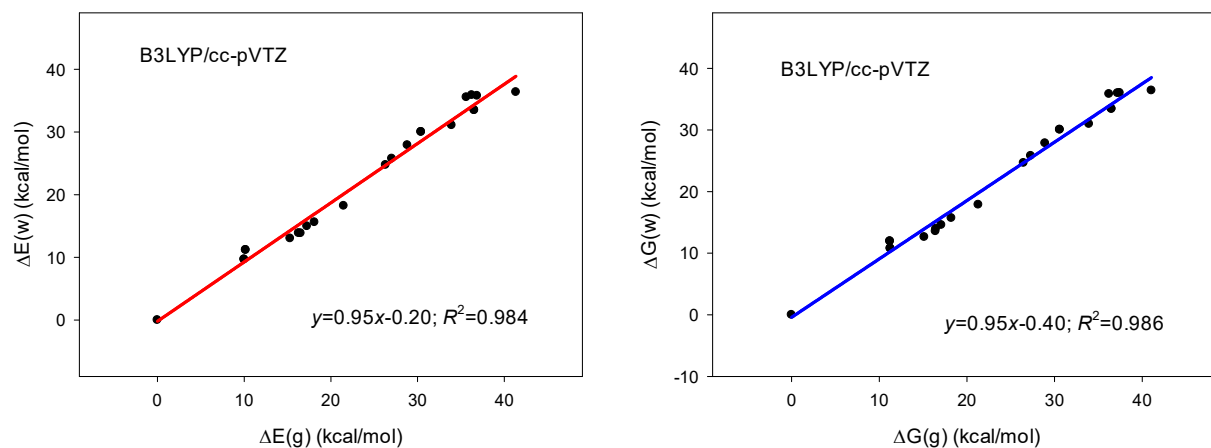

**Figure S2.** The correlations between relative (a) energy  $\Delta E$  and (b) relative Gibbs free energy  $\Delta G$  (kcal/mol) of pyrido[m,n]diazepines ( $m=1, n=2-5$ ;  $m=2, n=3,4$ ) estimated using the B3LYP/cc-pVTZ method for molecules in the gas phase and water simulated using a PCM model.

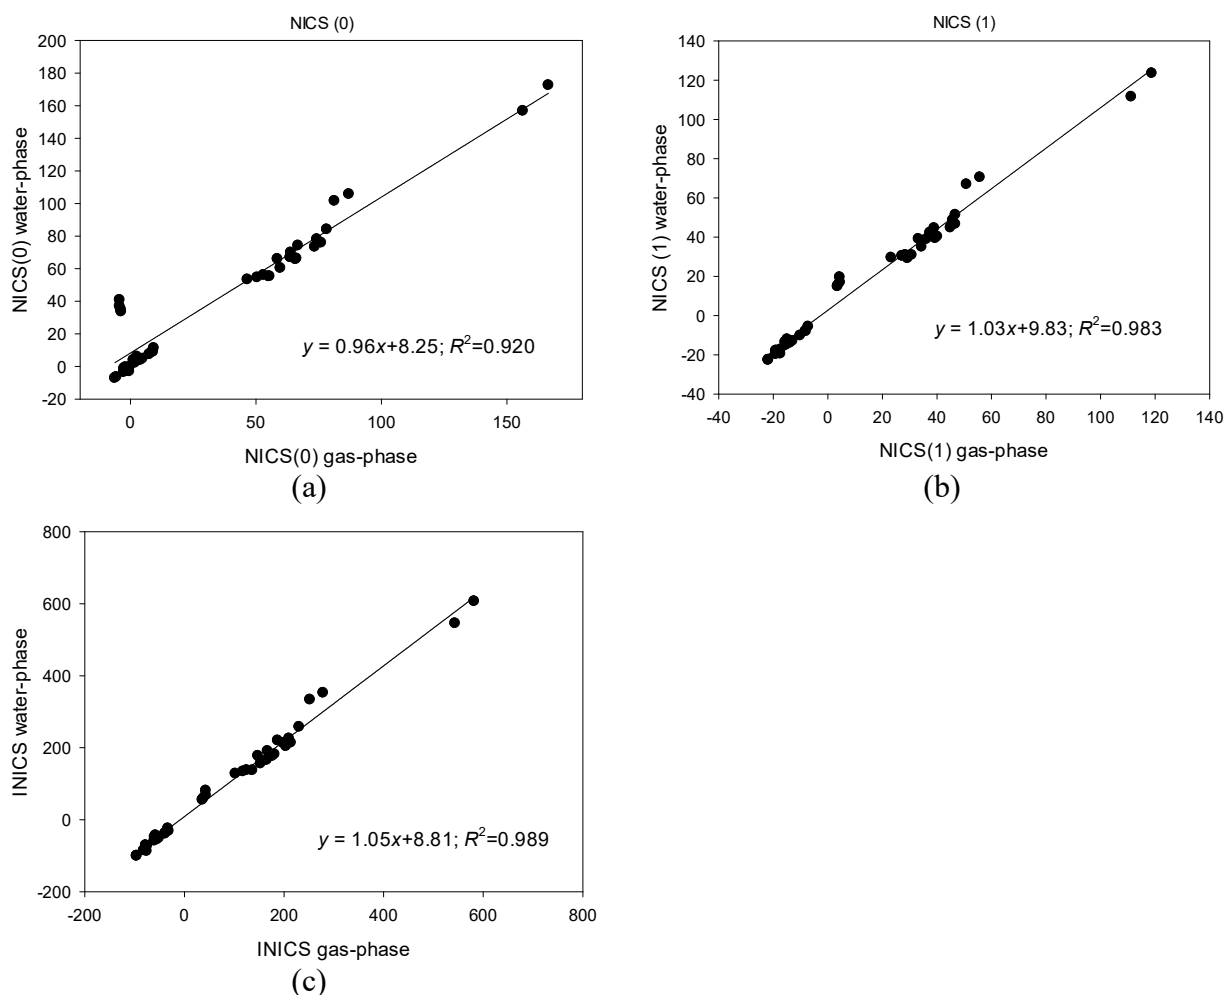

**Figure S3.** The correlations between NICS parameters of rings in pyrido[m,n]diazepines ( $m=1, n=2-5$ ;  $m=2, n=3,4$ ) estimated using the B3LYP/cc-pVTZ method for molecules in the gas phase and water simulated using a PCM model: (a) NICS(0); (b) NICS(1); and (c) INICS index.



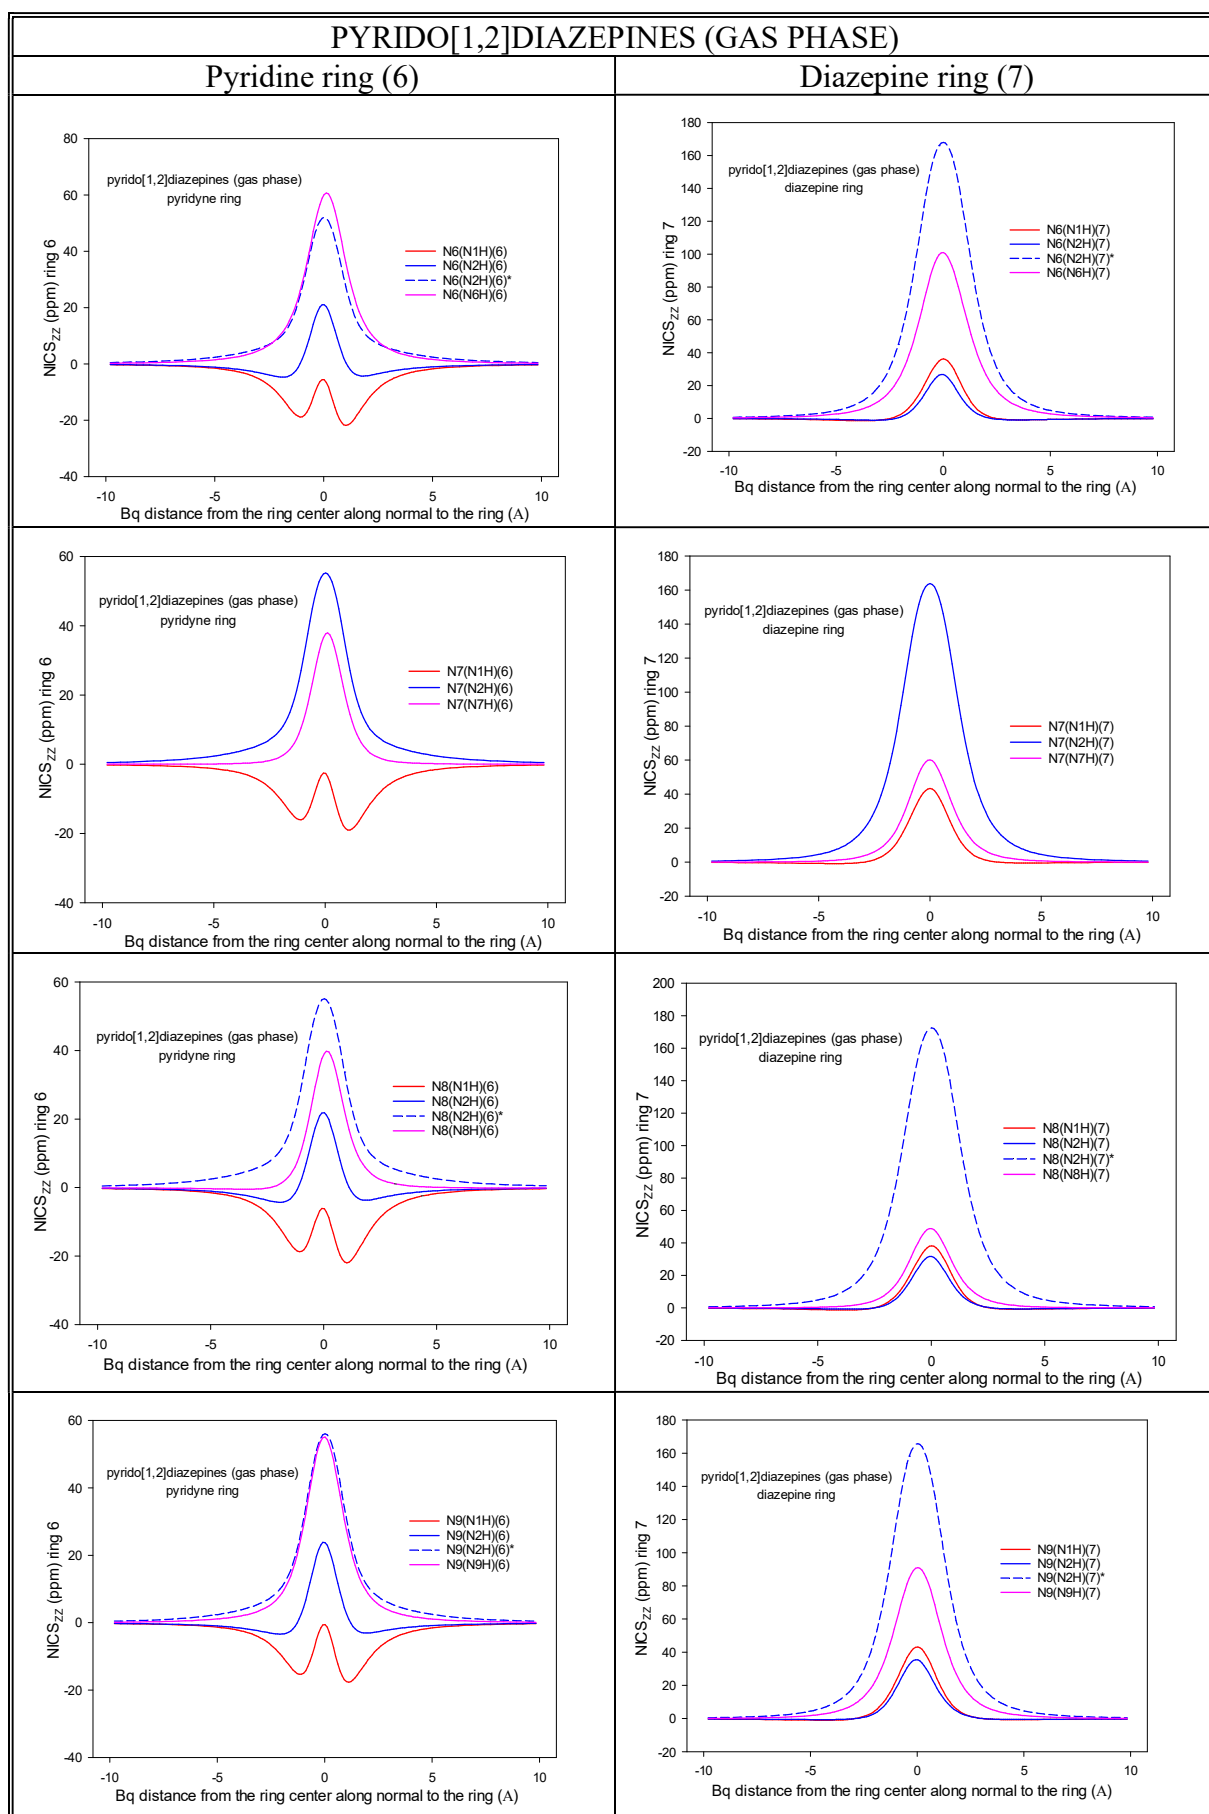

**Figure S4.** The NICS<sub>zz</sub>-scans vs. distance from the ring center along the normal to the ring for the pyrido[1,2]diazepines for N6, N7, N8, and N9 condensation type.

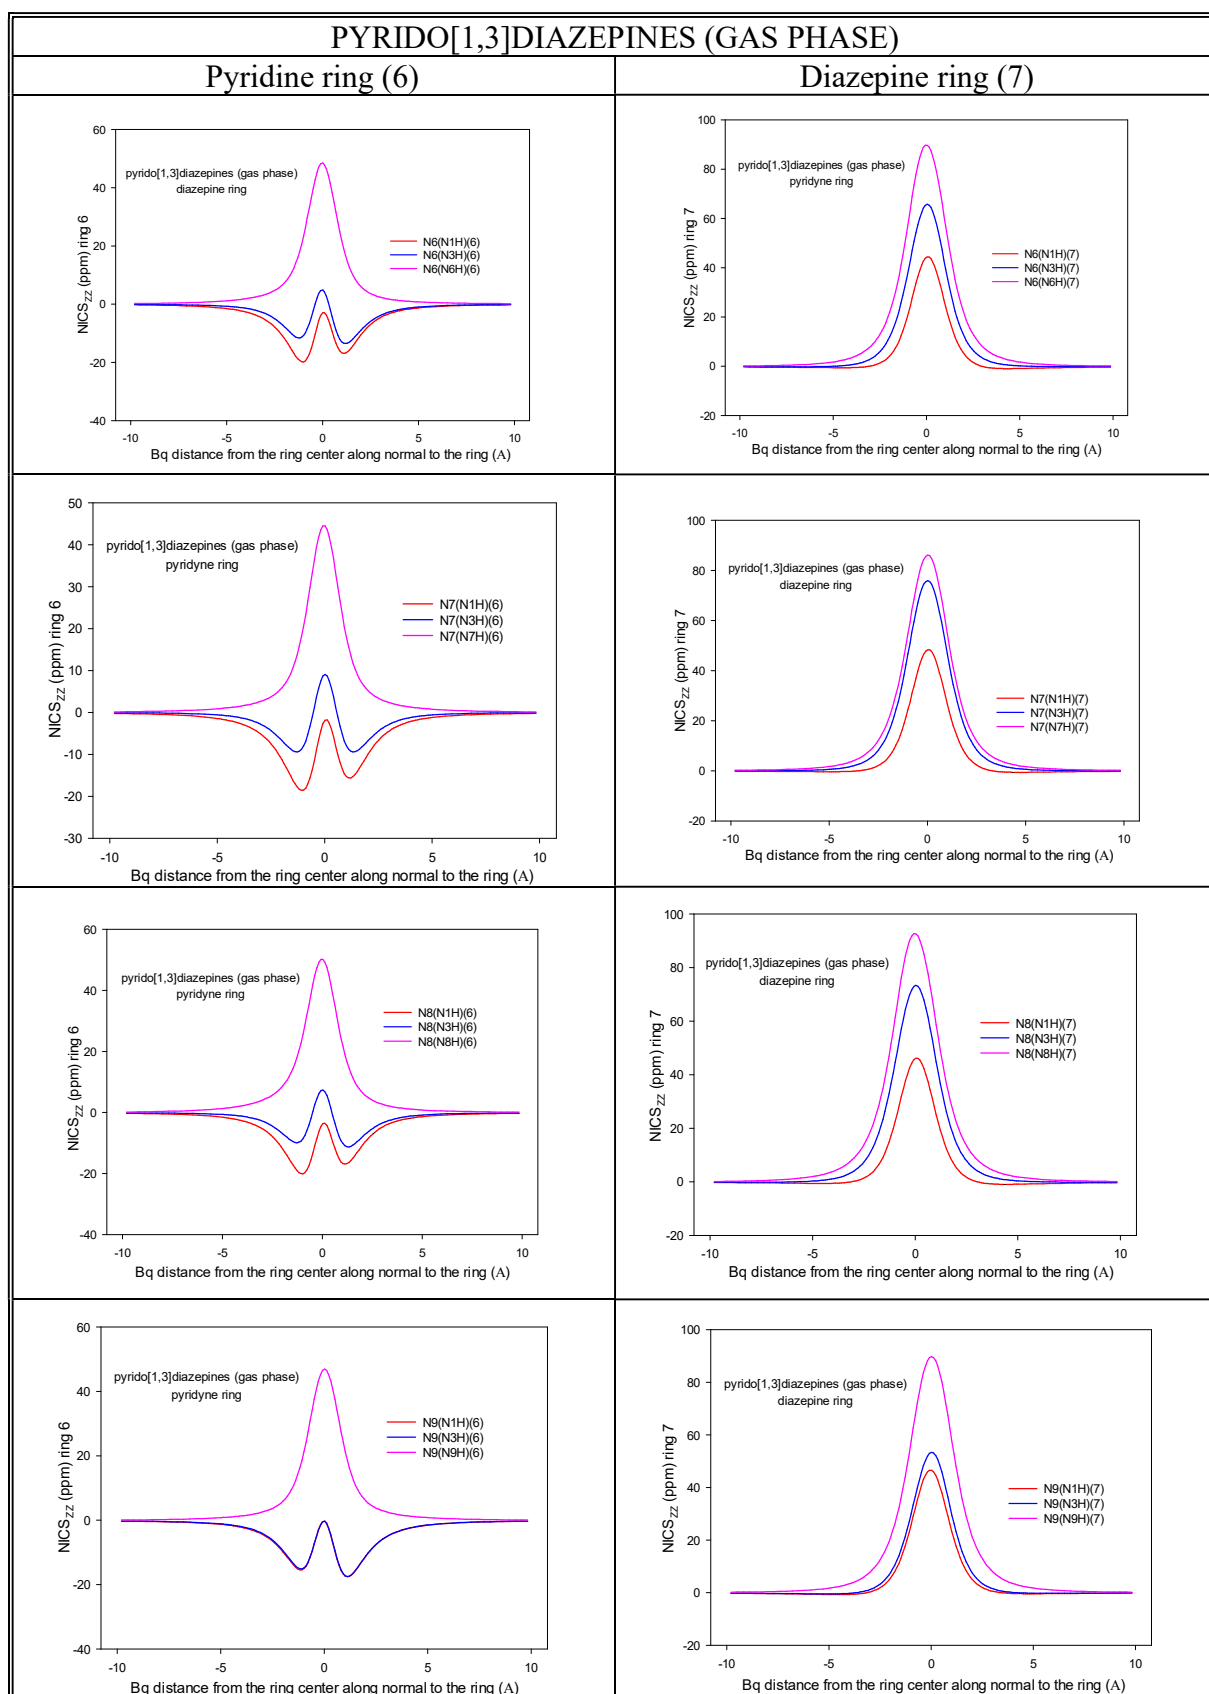

**Figure S5.** The NICS<sub>zz</sub>-scans vs. distance from the ring center along the normal to the ring for the pyrido[1,3]diazepines for N6, N7, N8, and N9 condensation type.

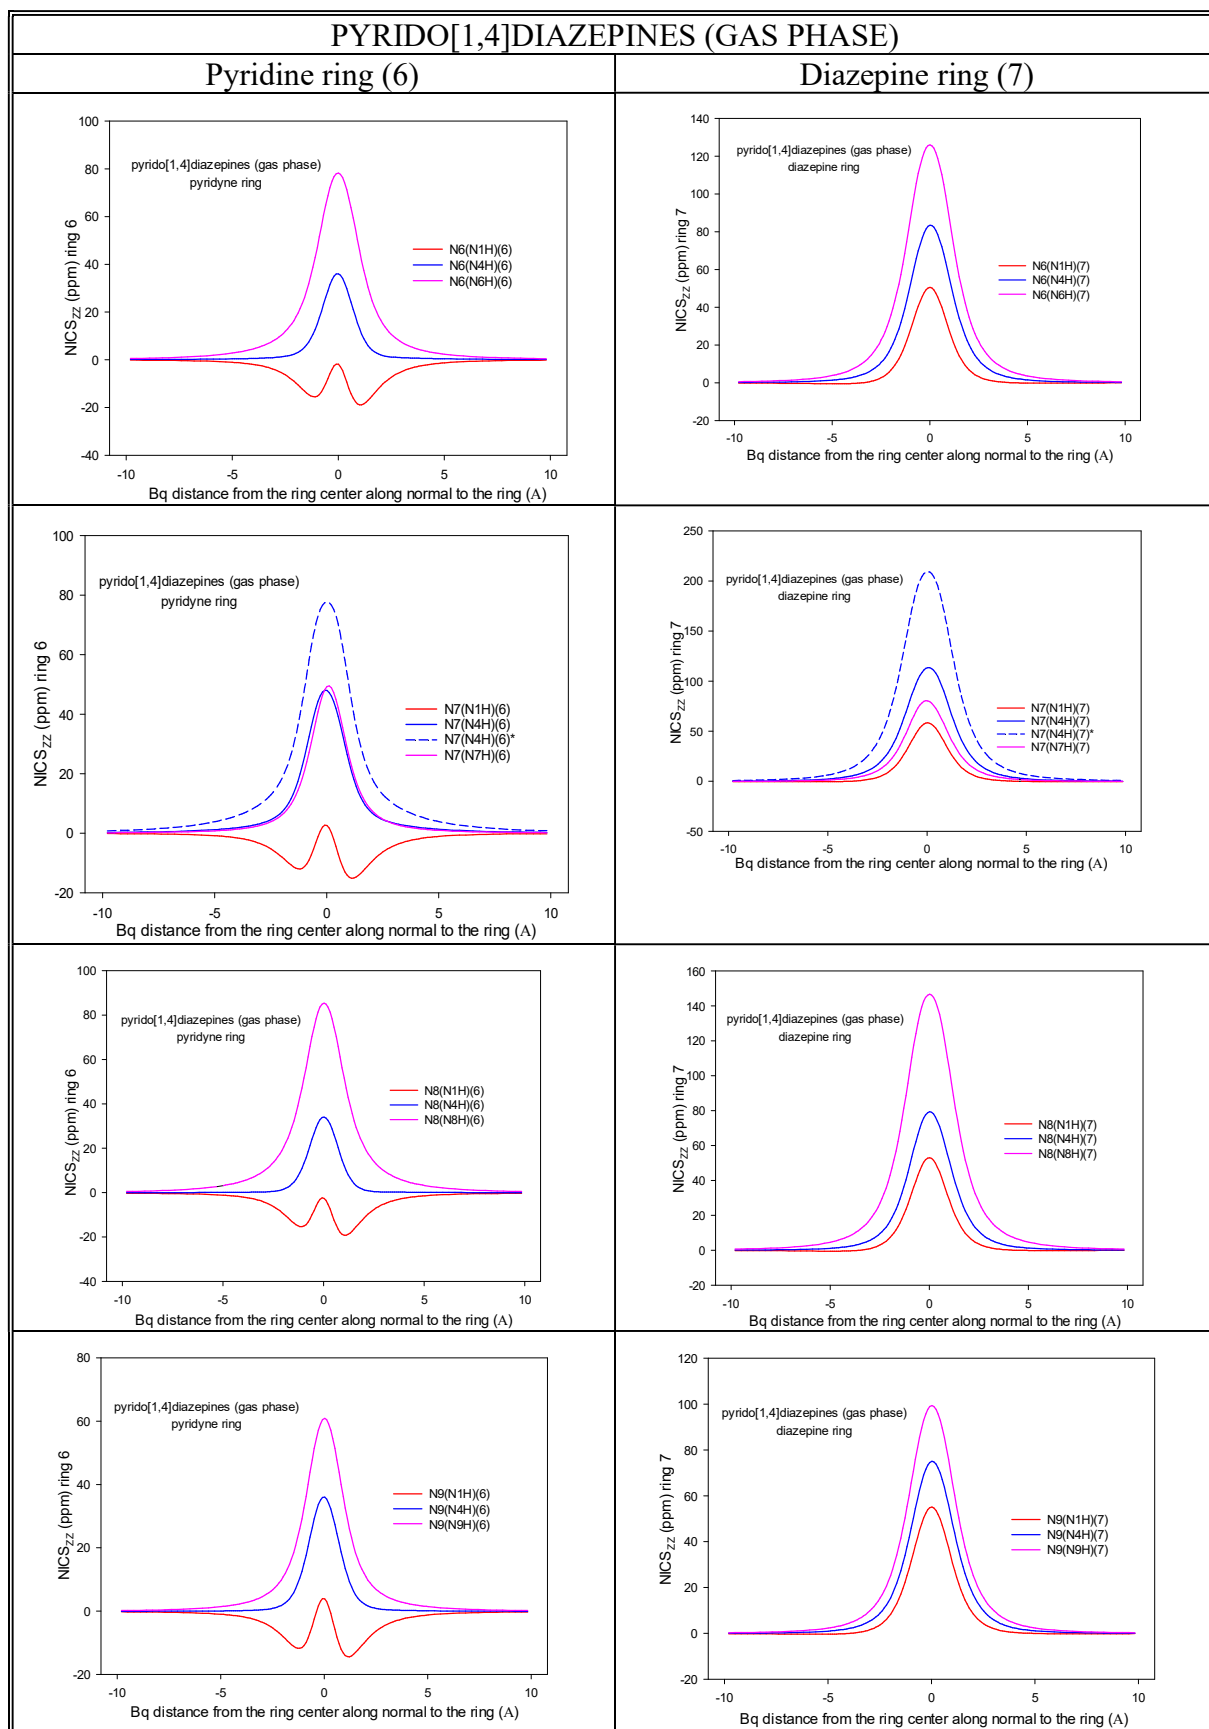

**Figure S6.** The NICS<sub>zz</sub>-scans vs. distance from the ring center along the normal to the ring for the pyrido[1,4]diazepines for N6, N7, N8, and N9 condensation type.

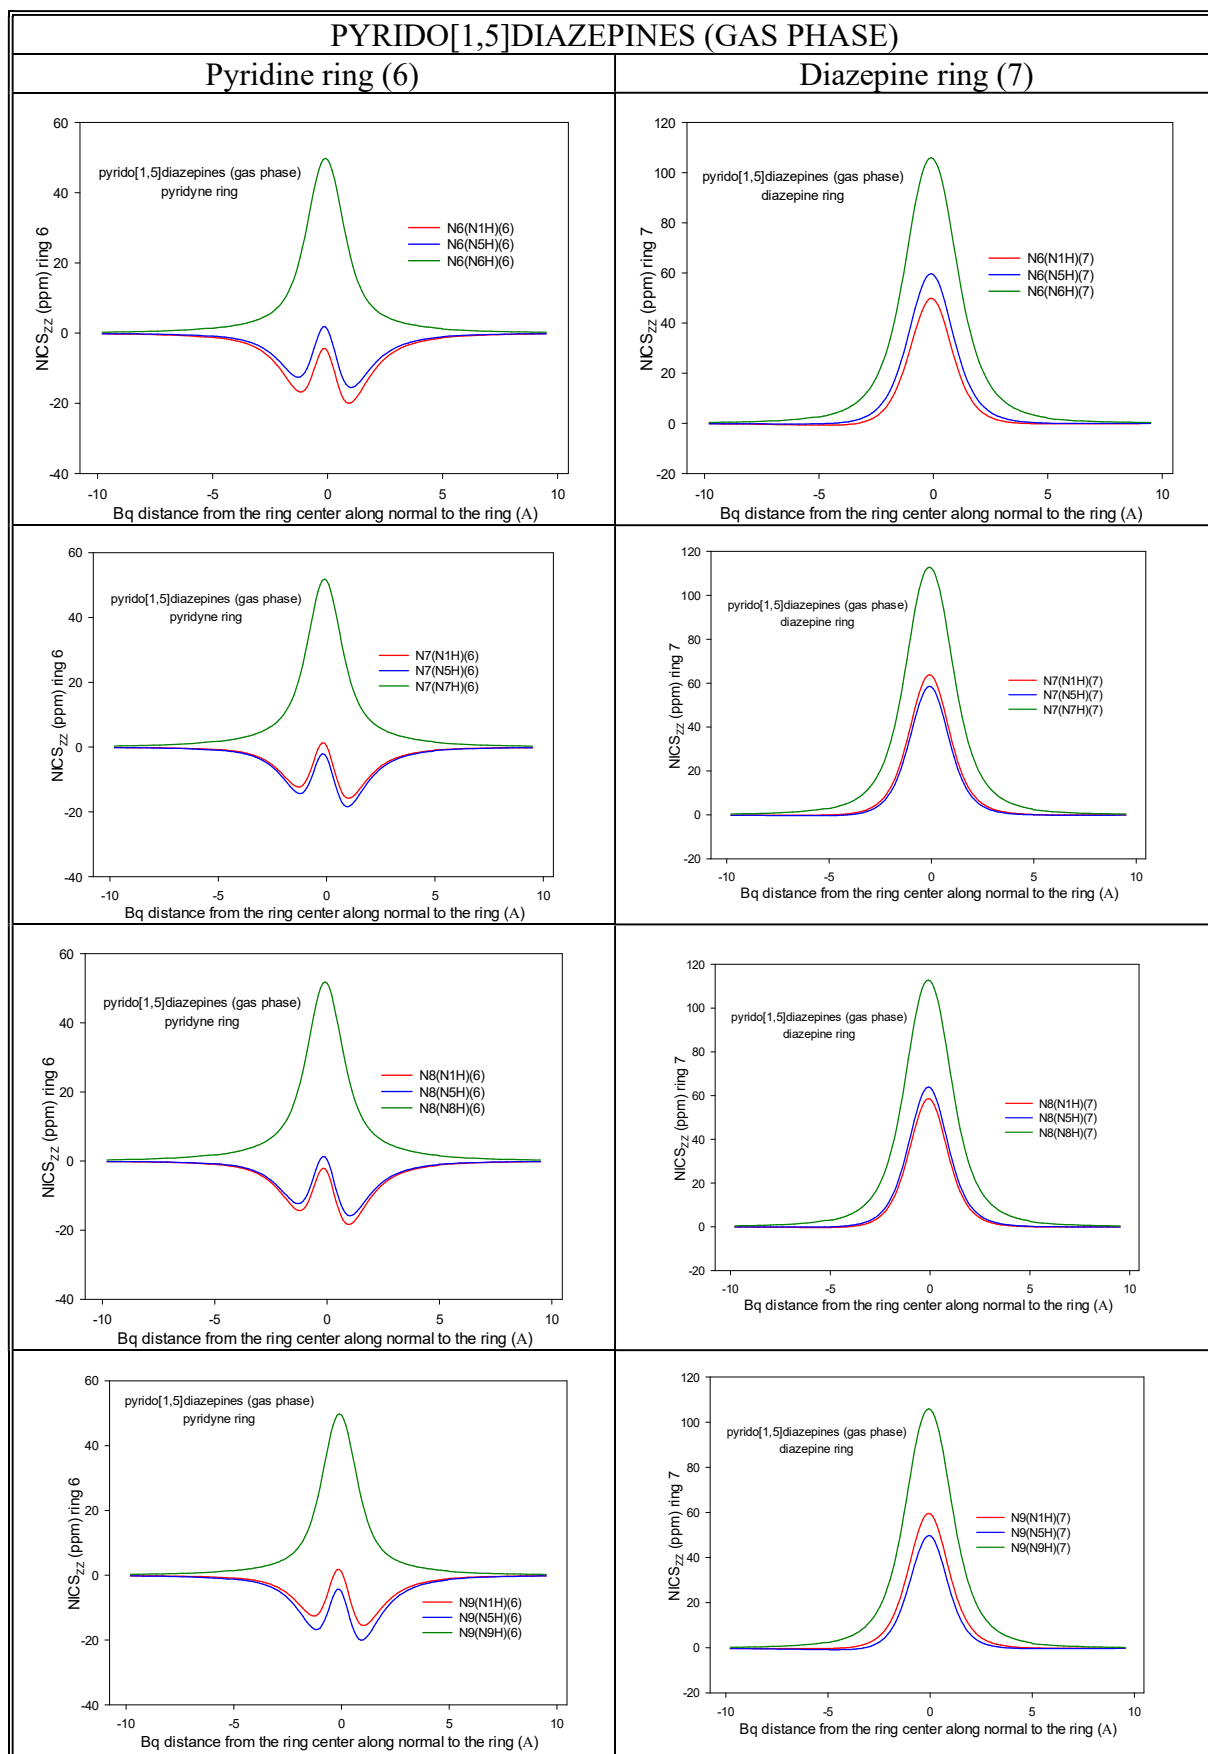

**Figure S7.** The NICS<sub>zz</sub>-scans vs. distance from the ring center along the normal to the ring for the pyrido[1,5]diazepines for N6, N7, N8, and N9 condensation type.

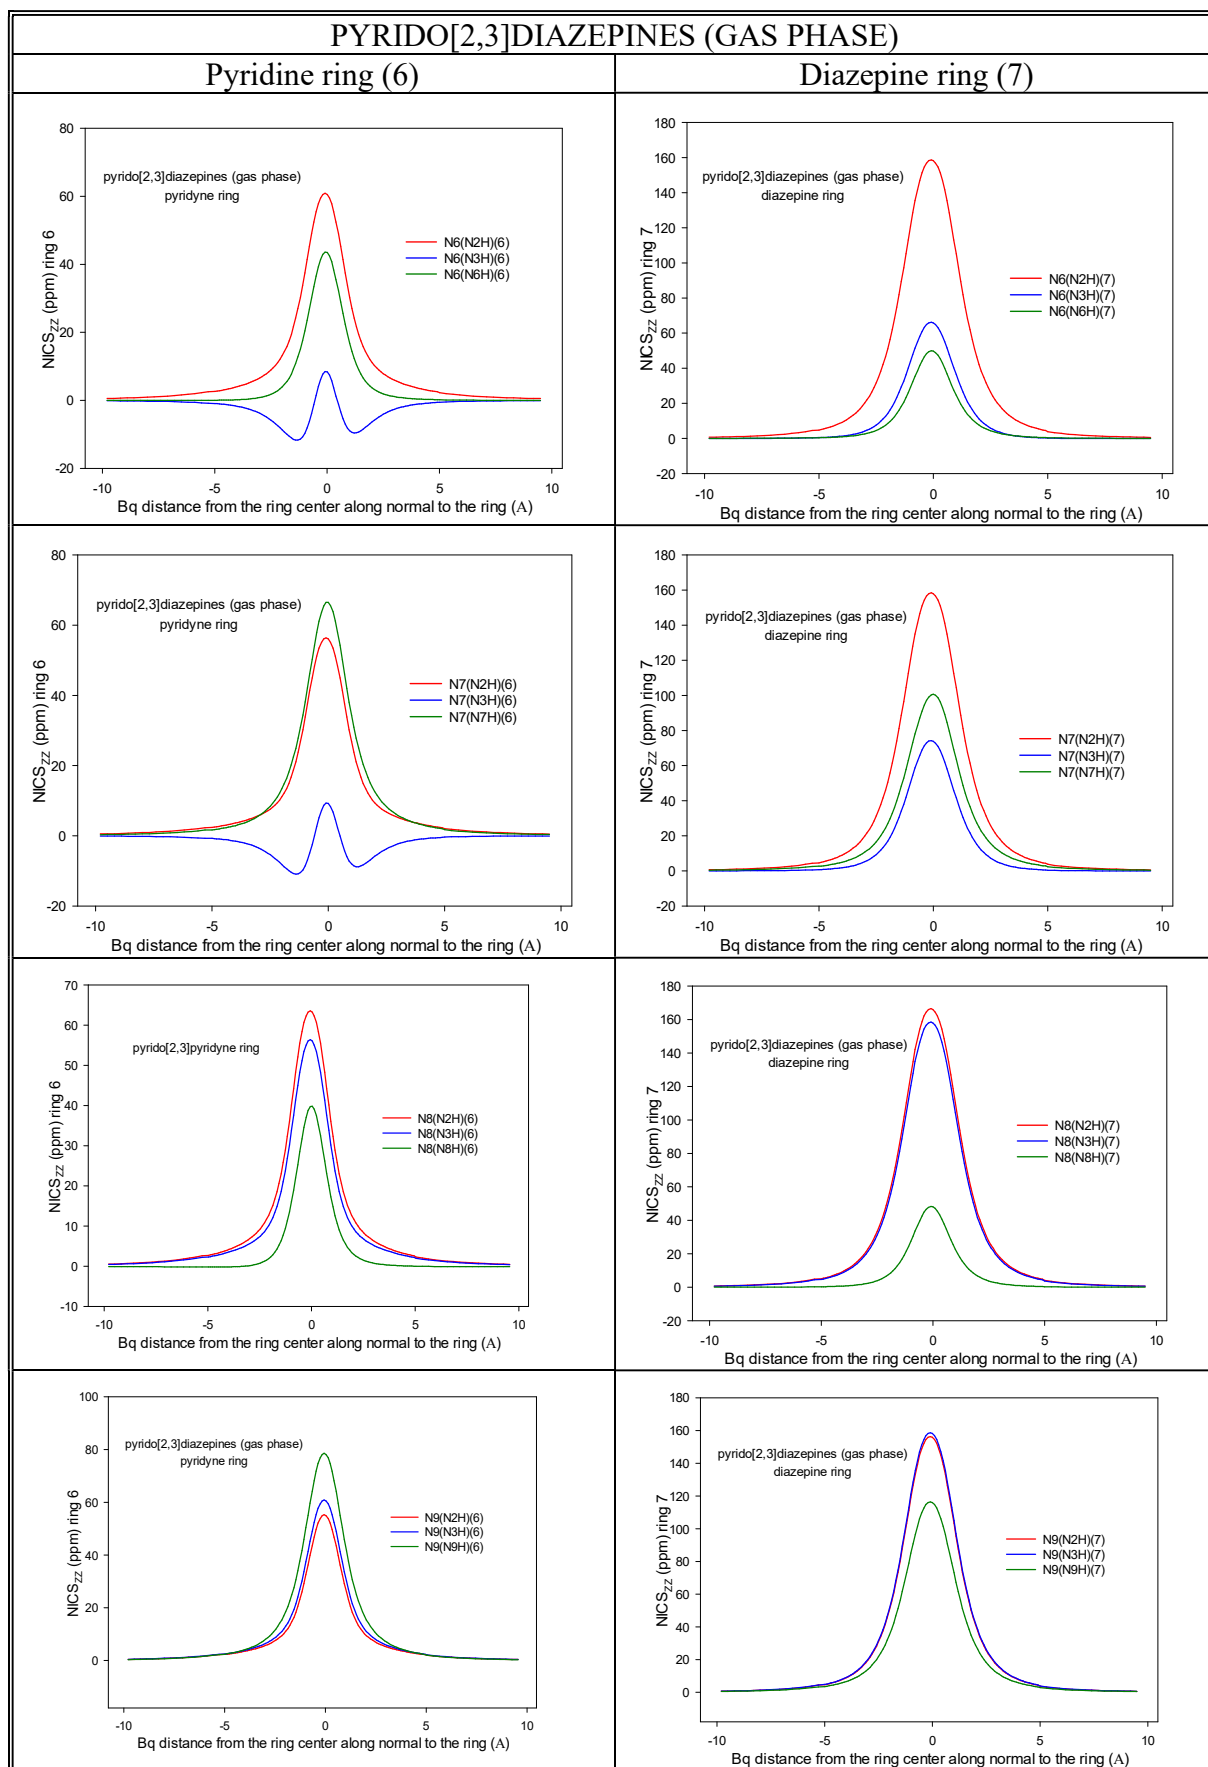

**Figure S8.** The NICS<sub>zz</sub>-scans vs. distance from the ring center along the normal to the ring for the pyrido[2,3]diazepines for N6, N7, N8, and N9 condensation type.

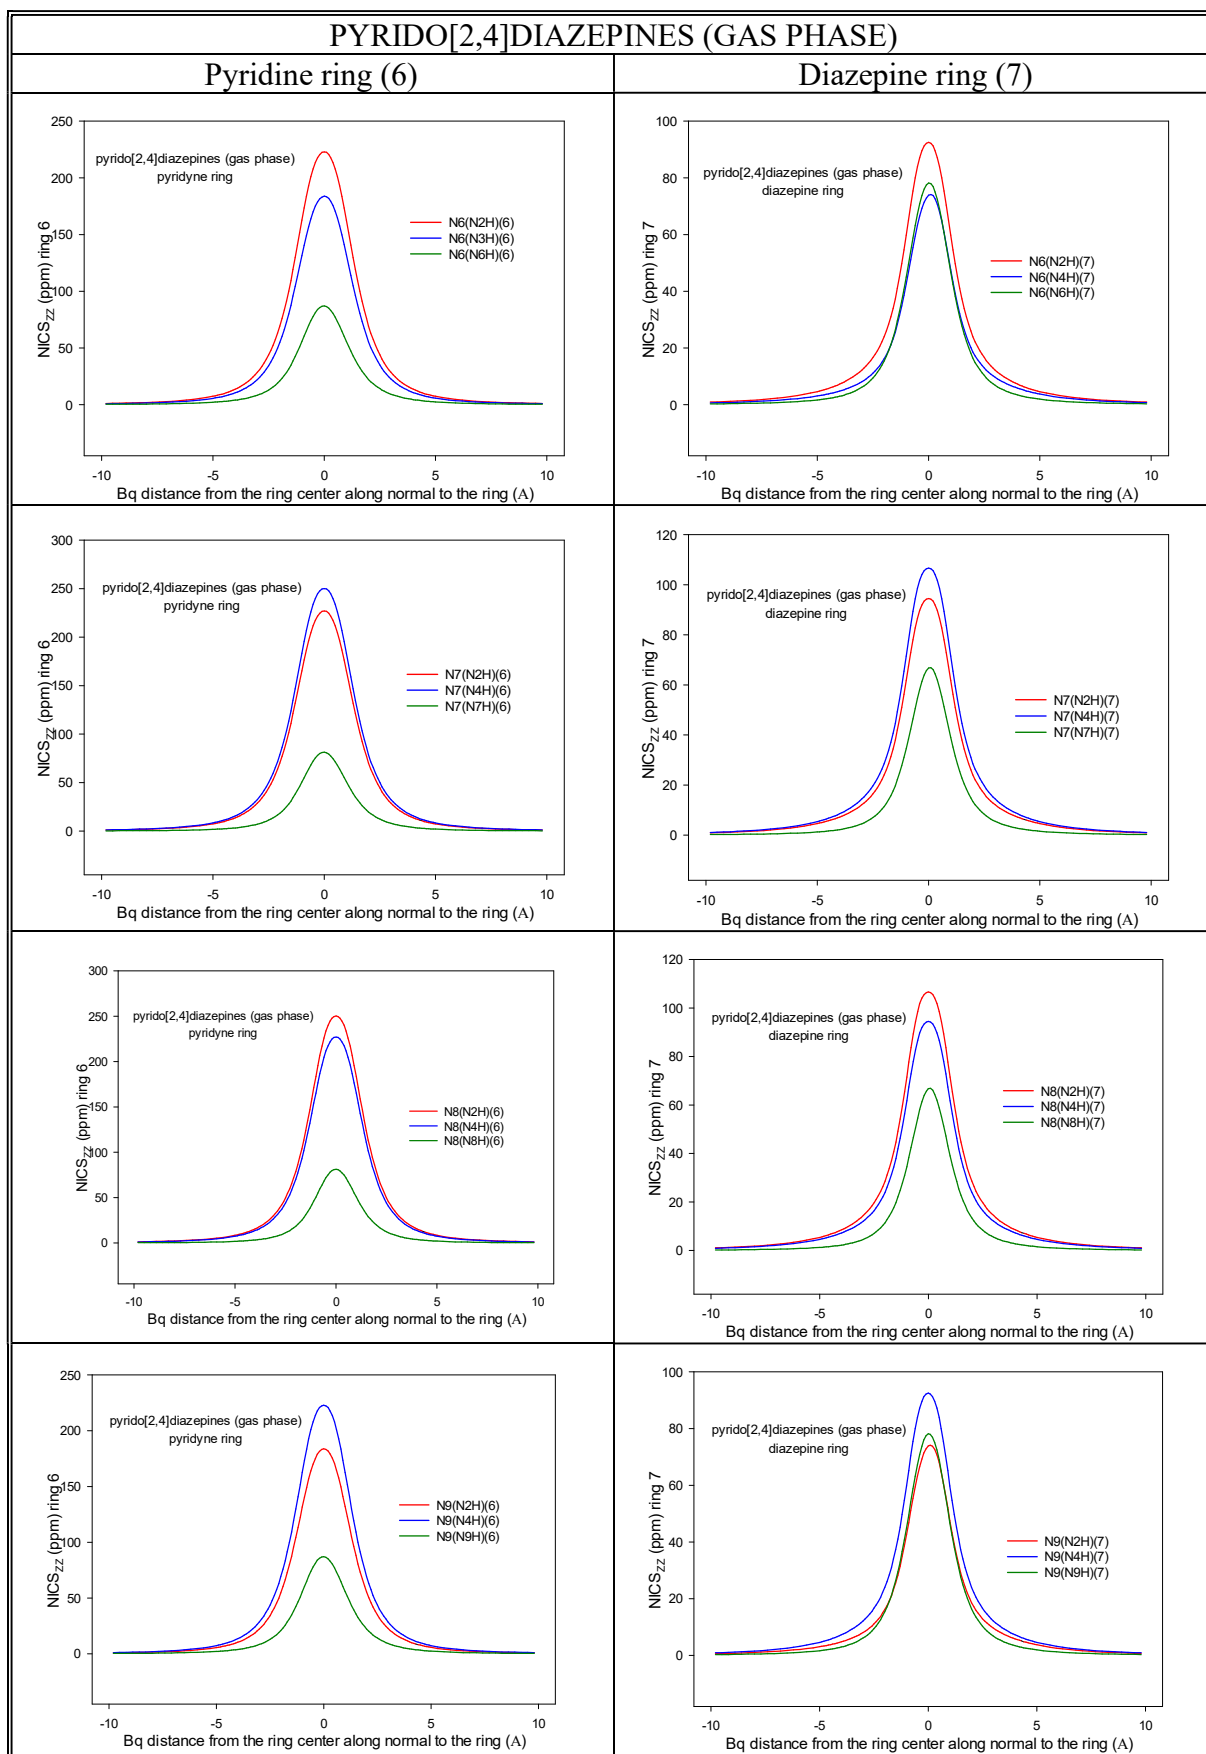

**Figure S9.** The NICS<sub>zz</sub>-scans vs. distance from the ring center along the normal to the ring for the pyrido[2,4]diazepines for N6, N7, N8, and N9 condensation type.

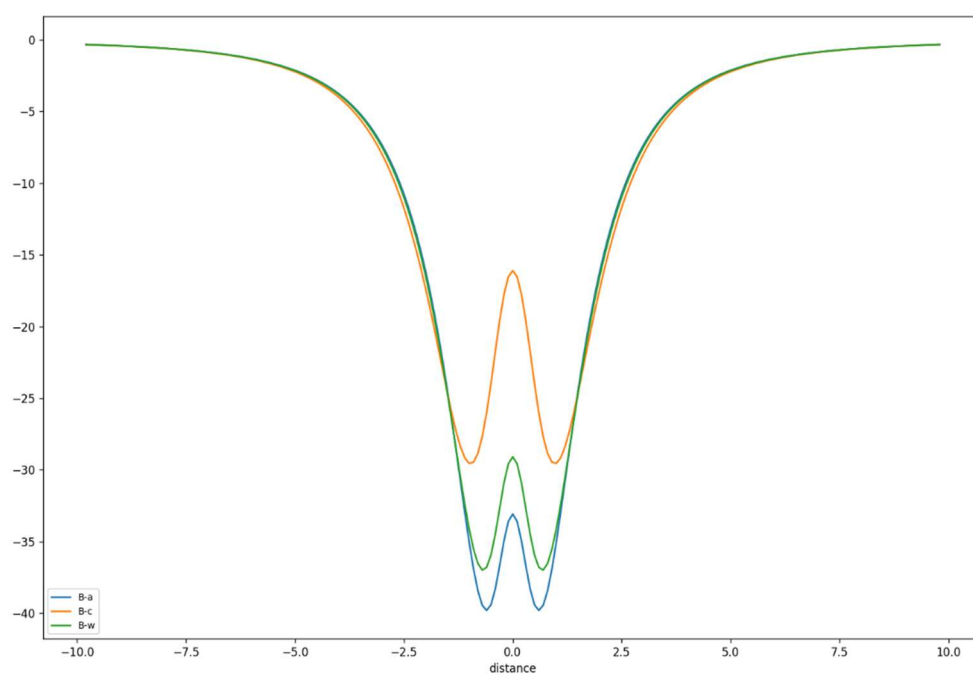

**Figure S10.** The NICS curves taken for the normal straight lines through the center of the benzene plane (c - orange), the point in the middle from the center to the bond center (a-blue), and in the middle from the center to the C-atom (w - green). The INICSs are equal to: -145.63, -170.96, and -165.77, respectively.

**Table S6** Different NICS aromaticity indices of ring in pyrido[1,2]diazepines in the gas phase. DT – diazepine type, PC - pyridine condensation type, T – tautomer type, R - ring type, P – planarity (p- planar; n- non-planar), I – integral NICS (INICS. ppm/Å), I- – integral NICS for the distances below the plane (ppm/Å), I+ – integral NICS for the distances above the plane (ppm/Å),  $\Delta I = I(-) - I(+)$  (ppm/Å); NICS(0), NICS(1), NICS(-1), and  $\Delta NICS(-1,1) = NICS(-1) - NICS(1)$  (ppm), MIN1 and MIN2 are minima of the NICS function for distances below and above the ring plane, respectively, and NICS(MIN1) and NICS(MIN2) are the NICS function values in MIN1 and MIN2.

|                       |    | Gas Phase |   |   |       |       |       |       |             |              |             |                 |      |                |      |                |
|-----------------------|----|-----------|---|---|-------|-------|-------|-------|-------------|--------------|-------------|-----------------|------|----------------|------|----------------|
| DT                    | PC | T         | R | P | I     | I(-)  | I(+)  | ΔI    | NICS<br>(0) | NICS<br>(-1) | NICS<br>(1) | ΔNICS<br>(-1,1) | MIN1 | NICS<br>(MIN1) | MIN2 | NICS<br>(MIN2) |
| pyrido[1,2]diazepines | N6 | N1-H      | 6 | n | -95.9 | -44.7 | -51.2 | -6.5  | -5.6        | -18.7        | -21.8       | 3.1             | -1.1 | -18.8          | 1.0  | -21.8          |
|                       |    | N2-H      | 6 | n | -0.4  | 0.1   | -0.5  | -0.6  | 21.1        | 1.9          | 0.5         | 1.4             | -1.9 | -4.7           | 1.8  | -4.3           |
|                       |    | N2-H      | 6 | p | 158.8 | 79.4  | 79.4  | 0.0   | 52.1        | 27.5         | 27.5        | 0.0             | -9.8 | 0.5            | 9.8  | 0.5            |
|                       |    | N6-H      | 6 | n | 77.0  | 43.7  | 33.2  | -10.5 | 40.1        | 18.2         | 13.8        | 4.5             | -7.7 | 0.0            | 3.7  | -0.4           |
|                       |    | N6-H      | 6 | n | 171.5 | 80.0  | 91.6  | 11.6  | 60.3        | 29.0         | 36.0        | -6.9            | -9.8 | 0.3            | 9.8  | 0.3            |
|                       | N7 | N1-H      | 6 | n | -81.7 | -37.3 | -44.4 | -7.1  | -2.7        | -15.8        | -19.0       | 3.3             | -1.1 | -16.0          | 1.1  | -19.0          |
|                       |    | N2-H      | 6 | p | 168.6 | 84.3  | 84.3  | 0.0   | 55.3        | 30.5         | 30.5        | 0.0             | -9.8 | 0.5            | 9.8  | 0.5            |
|                       |    | N7-H      | 6 | n | 74.7  | 33.6  | 41.1  | 7.4   | 37.7        | 12.5         | 16.8        | -4.3            | -9.8 | 0.0            | 9.8  | 0.0            |
|                       | N8 | N1-H      | 6 | n | -96.0 | -44.4 | -51.5 | -7.1  | -6.2        | -18.6        | -21.9       | 3.3             | -1.1 | -18.7          | 1.0  | -21.9          |
|                       |    | N2-H      | 6 | n | 4.8   | 2.2   | 2.6   | 0.4   | 21.9        | 2.7          | 1.6         | 1.1             | -2.0 | -4.3           | 1.8  | -3.6           |
|                       |    | N2-H      | 6 | p | 170.2 | 85.1  | 85.1  | 0.0   | 55.1        | 30.2         | 30.2        | 0.0             | -9.8 | 0.5            | 9.8  | 0.5            |
|                       |    | N8-H      | 6 | n | 75.7  | 29.2  | 46.5  | 17.4  | 39.2        | 11.4         | 19.5        | -8.1            | -3.4 | -0.4           | 8.6  | 0.0            |
|                       | N9 | N1-H      | 6 | n | -75.6 | -34.9 | -40.7 | -5.8  | -0.5        | -14.9        | -17.4       | 2.5             | -1.2 | -15.2          | 1.1  | -17.5          |
|                       |    | N2-H      | 6 | n | 12.9  | 7.3   | 5.7   | -1.6  | 23.9        | 4.7          | 2.7         | 2.0             | -2.1 | -3.3           | 1.9  | -3.0           |
|                       |    | N2-H      | 6 | p | 173.3 | 86.6  | 86.6  | 0.0   | 56.1        | 30.9         | 30.9        | 0.0             | -9.8 | 0.5            | 9.8  | 0.5            |
|                       |    | N9-H      | 6 | n | 146.7 | 74.5  | 72.1  | -2.4  | 55.1        | 28.9         | 27.5        | 1.4             | -9.8 | 0.2            | 9.8  | 0.2            |
|                       | N6 | N1-H      | 7 | n | 64.5  | 31.9  | 32.6  | 0.7   | 36.2        | 17.7         | 16.6        | 1.1             | -3.7 | -1.5           | 3.6  | -1.0           |
|                       |    | N2-H      | 7 | n | 41.7  | 22.4  | 19.3  | -3.0  | 26.6        | 12.3         | 9.8         | 2.5             | -3.2 | -1.1           | 3.4  | -1.0           |
|                       |    | N2-H      | 7 | p | 588.9 | 294.4 | 294.4 | 0.0   | 168.0       | 120.7        | 120.7       | 0.0             | -9.8 | 0.6            | 9.8  | 0.6            |
|                       |    | N6-H      | 7 | n | 122.7 | 60.1  | 62.6  | 2.5   | 47.1        | 25.0         | 27.1        | -2.2            | -9.8 | 0.0            | 9.8  | 0.0            |
|                       |    | N6-H      | 7 | n | 329.4 | 164.9 | 164.5 | -0.4  | 101.0       | 66.2         | 65.4        | 0.8             | -9.8 | 0.4            | 9.8  | 0.4            |
|                       | N7 | N1-H      | 7 | n | 90.1  | 45.4  | 44.7  | -0.7  | 43.2        | 22.8         | 21.4        | 1.4             | -4.3 | -0.9           | 4.4  | -0.5           |
|                       |    | N2-H      | 7 | p | 569.4 | 284.7 | 284.7 | 0.0   | 163.8       | 116.7        | 116.7       | 0.0             | -9.8 | 0.6            | 9.8  | 0.6            |
|                       |    | N7-H      | 7 | n | 163.5 | 81.1  | 82.3  | 1.2   | 60.1        | 34.2         | 34.2        | 0.0             | -9.8 | 0.0            | 9.8  | 0.0            |
|                       | N8 | N1-H      | 7 | n | 70.5  | 35.3  | 35.2  | -0.1  | 38.2        | 19.0         | 17.6        | 1.5             | -3.8 | -1.4           | 3.7  | -0.9           |
|                       |    | N2-H      | 7 | n | 57.5  | 29.9  | 27.6  | -2.3  | 31.6        | 15.3         | 13.1        | 2.3             | -3.6 | -0.8           | 3.9  | -0.7           |
|                       |    | N2-H      | 7 | p | 604.5 | 302.2 | 302.2 | 0.0   | 172.6       | 123.8        | 123.8       | 0.0             | -9.8 | 0.6            | 9.8  | 0.6            |
|                       |    | N8-H      | 7 | n | 128.2 | 65.7  | 62.5  | -3.1  | 48.8        | 28.4         | 25.6        | 2.8             | -9.8 | 0.0            | 9.8  | 0.0            |
|                       | N9 | N1-H      | 7 | n | 92.1  | 46.6  | 45.5  | -1.1  | 43.3        | 23.3         | 21.6        | 1.8             | -4.3 | -0.8           | 4.5  | -0.5           |
|                       |    | N2-H      | 7 | n | 74.3  | 38.6  | 35.7  | -3.0  | 35.6        | 18.9         | 16.3        | 2.6             | -4.3 | -0.5           | 4.6  | -0.4           |
|                       |    | N2-H      | 7 | p | 580.5 | 290.2 | 290.2 | 0.0   | 165.9       | 118.8        | 118.8       | 0.0             | -9.8 | 0.6            | 9.8  | 0.6            |
|                       |    | N9-H      | 7 | n | 287.5 | 144.2 | 143.3 | -0.9  | 91.2        | 58.9         | 58.9        | 0.0             | -9.8 | 0.2            | 9.8  | 0.2            |



**Table S7.** Different NICS aromaticity indices of ring in pyrido[1,3]diazepines in the gas phase. DT – diazepine type, PC - pyridine condensation type, T – tautomer type, R -ring type, P – planarity (p- planar; n- non-planar). I – integral NICS (INICS. ppm/Å), I- – integral NICS for the distances below the plane (ppm/Å), I+ – integral NICS for the distances below the plane (ppm/Å),  $\Delta I = I(-) - I(+)$  (ppm/Å); NICS(0), NICS(1), NICS(-1), and  $\Delta NICS(-1,1) = NICS(-1) - NICS(1)$  (ppm), MIN1 and MIN2 are minima of the NICS function for distances below and above the ring plane, respectively, and NICS(MIN1) and NICS(MIN2) are the NICS function values in MIN1 and MIN2.

| Gas Phase             |    |      |   |   |       |       |       |            |          |           |          |                      |      |             |      |             |
|-----------------------|----|------|---|---|-------|-------|-------|------------|----------|-----------|----------|----------------------|------|-------------|------|-------------|
| DT                    | PC | T    | R | P | I     | I-    | I+    | $\Delta I$ | NICS (0) | NICS (-1) | NICS (1) | $\Delta NICS (-1,1)$ | MIN1 | NICS (MIN1) | MIN2 | NICS (MIN2) |
| pyrido[1,3]diazepines | N6 | N1-H | 6 | n | -85.0 | -46.0 | -39.0 | 7.0        | -3.0     | -19.9     | -16.7    | -3.1                 | -1.0 | -19.9       | 1.1  | -17.0       |
|                       |    | N3-H | 6 | n | -50.9 | -22.6 | -28.3 | -5.7       | 4.8      | -10.8     | -13.0    | 2.2                  | -1.2 | -11.6       | 1.2  | -13.6       |
|                       |    | N6-H | 6 | n | 120.8 | 63.1  | 57.7  | -5.5       | 48.5     | 23.4      | 21.9     | 1.5                  | -9.8 | 0.2         | 9.8  | 0.1         |
|                       |    | N1-H | 6 | n | -78.4 | -42.9 | -35.6 | 7.3        | -1.9     | -18.5     | -15.3    | -3.2                 | -1.1 | -18.6       | 1.1  | -15.6       |
|                       |    | N3-H | 6 | p | -31.4 | -15.7 | -15.7 | 0.0        | 9.0      | -8.0      | -8.0     | 0.0                  | -1.3 | -9.4        | 1.3  | -9.4        |
|                       |    | N7-H | 6 | n | 106.0 | 55.6  | 50.5  | -5.1       | 44.5     | 20.6      | 17.9     | 2.7                  | -9.8 | 0.2         | 9.8  | 0.1         |
|                       |    | N1-H | 6 | n | -85.3 | -46.5 | -38.9 | 7.6        | -3.6     | -20.0     | -16.6    | -3.4                 | -1.0 | -20.0       | 1.1  | -16.9       |
|                       |    | N3-H | 6 | n | -38.3 | -17.1 | -21.1 | -4.0       | 7.5      | -8.5      | -10.1    | 1.6                  | -1.3 | -9.8        | 1.3  | -11.2       |
|                       |    | N8-H | 6 | n | 129.1 | 69.9  | 59.2  | -10.7      | 50.3     | 25.6      | 21.8     | 3.8                  | -9.8 | 0.2         | 9.8  | 0.2         |
|                       | N9 | N1-H | 6 | n | -74.8 | -34.6 | -40.2 | -5.7       | -0.3     | -15.0     | -17.3    | 2.3                  | -1.1 | -15.3       | 1.1  | -17.5       |
|                       |    | N3-H | 6 | n | -73.0 | -33.1 | -39.8 | -6.7       | -0.2     | -14.7     | -17.2    | 2.5                  | -1.1 | -15.0       | 1.1  | -17.4       |
|                       |    | N9-H | 6 | p | 114.4 | 57.2  | 57.2  | 0.0        | 47.0     | 21.3      | 21.3     | 0.0                  | -9.8 | 0.2         | 9.8  | 0.2         |
|                       | N6 | N1-H | 7 | n | 94.6  | 46.5  | 48.1  | 1.6        | 44.5     | 22.0      | 24.2     | -2.2                 | -4.6 | -0.5        | 4.3  | -0.9        |
|                       |    | N3-H | 7 | n | 176.8 | 88.1  | 88.7  | 0.6        | 65.8     | 39.5      | 39.4     | 0.1                  | -7.4 | -0.1        | 8.3  | -0.1        |
|                       |    | N6-H | 7 | p | 280.9 | 143.1 | 137.8 | -5.4       | 89.8     | 59.2      | 56.8     | 2.4                  | -9.8 | 0.2         | 9.8  | 0.2         |
|                       | N7 | N1-H | 7 | n | 107.6 | 52.7  | 54.9  | 2.2        | 48.4     | 24.5      | 26.7     | -2.3                 | -4.9 | -0.4        | 4.7  | -0.7        |
|                       |    | N3-H | 7 | n | 214.0 | 107.0 | 107.0 | 0.0        | 76.0     | 46.8      | 46.8     | 0.0                  | -9.8 | 0.0         | 9.8  | 0.0         |
|                       |    | N7-H | 7 | n | 265.1 | 133.1 | 132.0 | -1.1       | 86.1     | 54.9      | 54.8     | 0.0                  | -9.8 | 0.2         | 9.8  | 0.2         |
|                       | N8 | N1-H | 7 | n | 99.0  | 48.4  | 50.7  | 2.3        | 46.3     | 22.7      | 25.2     | -2.5                 | -4.6 | -0.5        | 4.4  | -0.8        |
|                       |    | N3-H | 7 | n | 204.0 | 101.7 | 102.3 | 0.6        | 73.4     | 44.7      | 44.9     | -0.2                 | -9.5 | 0.0         | 9.8  | 0.0         |
|                       |    | N8-H | 7 | n | 293.0 | 149.7 | 143.4 | -6.3       | 92.7     | 61.4      | 58.8     | 2.6                  | -9.8 | 0.3         | 9.8  | 0.2         |
|                       | N9 | N1-H | 7 | n | 102.5 | 52.6  | 49.9  | -2.7       | 46.6     | 25.9      | 23.2     | 2.7                  | -4.6 | -0.7        | 4.8  | -0.4        |
|                       |    | N3-H | 7 | n | 128.1 | 63.7  | 64.4  | 0.7        | 53.4     | 30.0      | 29.6     | 0.5                  | -5.3 | -0.5        | 5.9  | -0.2        |
|                       |    | N9-H | 7 | p | 278.3 | 139.2 | 139.2 | 0.0        | 89.9     | 57.7      | 57.7     | 0.0                  | -9.8 | 0.2         | 9.8  | 0.2         |

**Table S8.** Different NICS aromaticity indices of ring in pyrido[1,4]diazepines in the gas phase. DT – diazepine type, PC - pyridine condensation type, T – tautomer type, R -ring type, P – planarity (p- planar; n- non-planar), I – integral NICS (INICS, ppm/Å), I- – integral NICS for the distances below the plane (ppm/Å), I+ – integral NICS for the distances above the plane (ppm/Å),  $\Delta I = I(-) - I(+)$  (ppm/Å); NICS(0), NICS(1), NICS(-1), and  $\Delta NICS(-1,1) = NICS(-1) - NICS(1)$  (ppm), MIN1 and MIN2 are minima of the NICS function for distances below and above the ring plane, respectively, and NICS(MIN1) and NICS(MIN2) are the NICS function values in MIN1 and MIN2.

| Gas Phase             |    |      |   |   |       |       |       |     |             |              |             |                 |      |                |      |                |
|-----------------------|----|------|---|---|-------|-------|-------|-----|-------------|--------------|-------------|-----------------|------|----------------|------|----------------|
| DT                    | PC | T    | R | P | I     | I-    | I+    | ΔI  | NICS<br>(0) | NICS<br>(-1) | NICS<br>(1) | ΔNICS<br>(-1,1) | MIN1 | NICS<br>(MIN1) | MIN2 | NICS<br>(MIN2) |
| pyrido[1,4]diazepines | N6 | N1-H | 6 | n | -77.5 | -34.9 | -42.6 | 7.7 | -1.9        | -15.3        | -18.9       | 3.6             | -1.1 | -15.6          | 1.0  | -18.9          |
|                       |    | N4-H | 6 | n | 73.4  | 38.2  | 35.2  | 3.0 | 36.1        | 14.9         | 12.9        | 2.0             | -9.8 | 0.1            | 9.8  | 0.1            |
|                       |    | N6-H | 6 | n | 243.2 | 124.5 | 118.7 | 5.8 | 78.3        | 47.0         | 45.8        | 1.2             | -9.8 | 0.5            | 9.8  | 0.4            |
|                       | N7 | N1-H | 6 | n | -57.7 | -25.0 | -32.7 | 7.7 | 2.6         | -11.2        | -14.8       | 3.6             | -1.2 | -12.0          | 1.1  | -15.1          |
|                       |    | N4-H | 6 | n | 128.8 | 65.8  | 63.1  | 2.7 | 48.0        | 25.7         | 23.4        | 2.3             | -9.8 | 0.2            | 9.8  | 0.3            |
|                       |    | N4-H | 6 | p | 266.1 | 133.1 | 133.1 | 0.0 | 77.7        | 48.8         | 48.8        | 0.0             | -9.8 | 0.8            | 9.8  | 0.8            |
|                       |    | N7-H | 6 | n | 122.6 | 57.2  | 65.4  | 8.1 | 49.3        | 21.1         | 25.4        | -4.3            | -9.8 | 0.1            | 9.8  | 0.1            |
|                       | N8 | N1-H | 6 | n | -77.3 | -34.2 | -43.1 | 8.8 | -2.5        | -14.9        | -19.1       | 4.1             | -1.1 | -15.2          | 1.0  | -19.1          |
|                       |    | N4-H | 6 | n | 65.0  | 33.2  | 31.8  | 1.4 | 34.2        | 13.3         | 12.2        | 1.0             | -9.8 | 0.0            | 9.8  | 0.0            |
|                       |    | N8-H | 6 | p | 278.3 | 139.1 | 139.2 | 0.0 | 85.5        | 51.7         | 51.7        | 0.0             | -9.8 | 0.6            | 9.8  | 0.6            |
|                       | N9 | N1-H | 6 | n | -55.0 | -24.0 | -30.9 | 6.9 | 4.0         | -10.8        | -13.9       | 3.1             | -1.2 | -11.7          | 1.2  | -14.3          |
|                       |    | N4-H | 6 | n | 71.4  | 36.7  | 34.7  | 2.0 | 36.1        | 15.0         | 13.6        | 1.4             | -9.8 | 0.0            | 9.8  | 0.0            |
|                       |    | N9-H | 6 | p | 170.3 | 85.1  | 85.1  | 0.0 | 60.9        | 32.7         | 32.7        | 0.0             | -9.8 | 0.3            | 9.8  | 0.3            |
|                       | N6 | N1-H | 7 | n | 117.9 | 58.2  | 59.7  | 1.5 | 50.5        | 28.1         | 27.2        | 0.9             | -4.8 | -0.6           | 5.9  | -0.2           |
|                       |    | N4-H | 7 | n | 255.0 | 124.5 | 130.5 | 6.0 | 83.5        | 52.2         | 55.0        | -2.7            | -9.8 | 0.1            | 9.8  | 0.2            |
|                       | N7 | N6-H | 7 | n | 431.0 | 217.5 | 213.5 | 3.9 | 126.1       | 87.3         | 86.4        | 0.9             | -9.8 | 0.5            | 9.8  | 0.5            |
|                       |    | N1-H | 7 | n | 147.8 | 73.3  | 74.5  | 1.3 | 58.6        | 33.7         | 33.2        | 0.4             | -5.9 | -0.3           | 7.4  | -0.1           |
|                       |    | N4-H | 7 | n | 371.9 | 182.4 | 189.5 | 7.1 | 113.8       | 75.1         | 78.7        | -3.5            | -9.8 | 0.3            | 9.8  | 0.3            |
|                       |    | N4-H | 7 | p | 751.5 | 375.7 | 375.7 | 0.0 | 209.7       | 152.5        | 152.5       | 0.0             | -9.8 | 0.9            | 9.8  | 0.9            |
|                       |    | N7-H | 7 | n | 246.4 | 125.2 | 121.2 | 4.0 | 80.5        | 52.3         | 49.4        | 2.9             | -9.8 | 0.2            | 9.8  | 0.2            |
|                       | N8 | N1-H | 7 | n | 125.3 | 62.2  | 63.0  | 0.8 | 53.0        | 29.7         | 28.5        | 1.2             | -5.0 | -0.5           | 5.9  | -0.2           |
|                       |    | N4-H | 7 | n | 236.1 | 115.8 | 120.3 | 4.5 | 79.4        | 48.9         | 50.8        | -1.9            | -9.8 | 0.1            | 9.8  | 0.1            |
|                       |    | N8-H | 7 | p | 514.2 | 257.1 | 257.1 | 0.0 | 146.8       | 103.3        | 103.3       | 0.0             | -9.8 | 0.7            | 9.8  | 0.7            |
|                       | N9 | N1-H | 7 | n | 136.6 | 67.9  | 68.7  | 0.8 | 55.1        | 31.6         | 30.8        | 0.8             | -5.6 | -0.3           | 6.8  | -0.1           |
|                       |    | N4-H | 7 | n | 221.7 | 108.7 | 113.0 | 4.3 | 75.1        | 46.0         | 47.9        | -1.9            | -9.8 | 0.1            | 9.8  | 0.1            |
|                       |    | N9-H | 7 | p | 320.9 | 160.4 | 160.4 | 0.0 | 99.4        | 65.6         | 65.6        | 0.0             | -9.8 | 0.3            | 9.8  | 0.3            |

**Table S9.** Different NICS aromaticity indices of ring in pyrido[1,5]diazepines in the gas phase. DT – diazepine type, PC - pyridine condensation type, T – tautomer type, R -ring type, P – planarity (p- planar; n- non-planar), I – integral NICS (INICS. ppm/Å), I- – integral NICS for the distances below the plane (ppm/Å), I+ – integral NICS for the distances below the plane (ppm/Å),  $\Delta I = I(-) - I(+)$  (ppm/Å); NICS(0), NICS(1), NICS(-1), and  $\Delta NICS(-1,1) = NICS(-1) - NICS(1)$  (ppm), MIN1 and MIN2 are minima of the NICS function for distances below and above the ring plane, respectively, and NICS(MIN1) and NICS(MIN2) are the NICS function values in MIN1 and MIN2.

| Gas Phase             |    |      |   |   |       |       |       |       |             |              |             |                 |      |                |      |                |  |
|-----------------------|----|------|---|---|-------|-------|-------|-------|-------------|--------------|-------------|-----------------|------|----------------|------|----------------|--|
| DT                    | PC | T    | R | P | I     | I-    | I+    | ΔI    | NICS<br>(0) | NICS<br>(-1) | NICS<br>(1) | ΔNICS<br>(-1,1) | MIN1 | NICS<br>(MIN1) | MIN2 | NICS<br>(MIN2) |  |
| pyrido[1,5]diazepines | N6 | N1-H | 6 | n | -84.5 | -38.1 | -46.4 | -8.3  | -4.4        | -16.7        | -20.0       | 3.3             | -1.1 | -16.8          | 1.0  | -20.0          |  |
|                       |    | N5-H | 6 | n | -60.3 | -26.0 | -34.3 | -8.2  | 1.8         | -12.1        | -15.3       | 3.2             | -1.2 | -12.6          | 1.1  | -15.5          |  |
|                       |    | N6-H | 6 | p | 133.1 | 66.6  | 66.6  | 0.0   | 49.9        | 24.4         | 24.4        | 0.0             | -9.8 | 0.2            | 9.8  | 0.2            |  |
|                       | N7 | N1-H | 6 | n | -60.0 | -25.4 | -34.6 | -9.3  | 1.2         | -11.8        | -15.6       | 3.8             | -1.2 | -12.4          | 1.1  | -15.8          |  |
|                       |    | N5-H | 6 | n | -72.9 | -31.4 | -41.6 | -10.2 | -2.2        | -14.1        | -18.4       | 4.2             | -1.1 | -14.4          | 1.1  | -18.4          |  |
|                       |    | N7-H | 6 | p | 144.4 | 72.2  | 72.2  | 0.0   | 51.9        | 25.6         | 25.6        | 0.0             | -9.8 | 0.3            | 9.8  | 0.3            |  |
|                       | N8 | N1-H | 6 | n | -72.9 | -31.4 | -41.6 | -10.2 | -2.2        | -14.1        | -18.4       | 4.2             | -1.1 | -14.4          | 1.1  | -18.4          |  |
|                       |    | N5-H | 6 | n | -60.0 | -25.4 | -34.6 | -9.3  | 1.2         | -11.8        | -15.6       | 3.8             | -1.2 | -12.4          | 1.1  | -15.8          |  |
|                       |    | N8-H | 6 | p | 144.4 | 72.2  | 72.2  | 0.0   | 51.9        | 25.6         | 25.6        | 0.0             | -9.8 | 0.3            | 9.8  | 0.3            |  |
|                       | N9 | N1-H | 6 | n | -60.3 | -26.0 | -34.3 | -8.2  | 1.8         | -12.1        | -15.3       | 3.2             | -1.2 | -12.6          | 1.1  | -15.5          |  |
|                       |    | N5-H | 6 | n | -84.5 | -38.1 | -46.4 | -8.3  | -4.4        | -16.7        | -20.0       | 3.3             | -1.1 | -16.8          | 1.0  | -20.0          |  |
|                       |    | N9-H | 6 | p | 133.1 | 66.6  | 66.6  | 0.0   | 49.9        | 24.4         | 24.4        | 0.0             | -9.8 | 0.2            | 9.8  | 0.2            |  |
|                       | N6 | N1-H | 7 | n | 114.1 | 55.6  | 58.5  | 3.0   | 49.9        | 27.1         | 26.9        | 0.2             | -4.6 | -0.7           | 5.6  | -0.2           |  |
|                       |    | N5-H | 7 | n | 153.2 | 75.9  | 77.3  | 1.4   | 59.7        | 35.0         | 34.4        | 0.6             | -5.9 | -0.3           | 7.7  | -0.1           |  |
|                       |    | N6-H | 7 | p | 343.9 | 171.9 | 171.9 | 0.0   | 106.0       | 70.9         | 70.9        | 0.0             | -9.8 | 0.3            | 9.8  | 0.3            |  |
|                       | N7 | N1-H | 7 | n | 167.0 | 82.5  | 84.5  | 2.0   | 63.9        | 37.5         | 37.4        | 0.1             | -6.5 | -0.2           | 8.3  | -0.1           |  |
|                       |    | N5-H | 7 | n | 146.1 | 71.8  | 74.4  | 2.6   | 58.6        | 33.4         | 33.3        | 0.0             | -5.6 | -0.4           | 7.1  | -0.1           |  |
|                       |    | N7-H | 7 | p | 373.5 | 186.8 | 186.8 | 0.0   | 112.9       | 76.6         | 76.6        | 0.0             | -9.8 | 0.4            | 9.8  | 0.4            |  |
|                       | N8 | N1-H | 7 | n | 146.1 | 71.8  | 74.4  | 2.6   | 58.6        | 33.4         | 33.3        | 0.0             | -5.6 | -0.4           | 7.1  | -0.1           |  |
|                       |    | N5-H | 7 | n | 167.0 | 82.5  | 84.5  | 2.0   | 63.9        | 37.5         | 37.4        | 0.1             | -6.5 | -0.2           | 8.3  | -0.1           |  |
|                       |    | N8-H | 7 | p | 373.5 | 186.8 | 186.8 | 0.0   | 112.9       | 76.6         | 76.6        | 0.0             | -9.8 | 0.4            | 9.8  | 0.4            |  |
|                       | N9 | N1-H | 7 | n | 153.2 | 75.9  | 77.3  | 1.4   | 59.7        | 35.0         | 34.4        | 0.6             | -5.9 | -0.3           | 7.7  | -0.1           |  |
|                       |    | N5-H | 7 | n | 114.1 | 55.6  | 58.5  | 3.0   | 49.9        | 27.1         | 26.9        | 0.2             | -4.6 | -0.7           | 5.6  | -0.2           |  |
|                       |    | N9-H | 7 | p | 343.9 | 171.9 | 171.9 | 0.0   | 106.0       | 70.9         | 70.9        | 0.0             | -9.8 | 0.3            | 9.8  | 0.3            |  |

**Table S10.** Different NICS aromaticity indices of ring in pyrido[2,3]diazepines in the gas phase. DT – diazepine type, PC - pyridine condensation type, T – tautomer type, R -ring type, P – planarity (p- planar; n- non-planar), I – integral NICS (INICS ppm/Å), I- – integral NICS for the distances below the plane (ppm/Å), I+ – integral NICS for the distances above the plane (ppm/Å),  $\Delta I = I(-) - I(+)$  (ppm/Å); NICS(0), NICS(1), NICS(-1), and  $\Delta NICS(-1,1) = NICS(-1) - NICS(1)$  (ppm), MIN1 and MIN2 are minima of the NICS function for distances below and above the ring plane, respectively, and NICS(MIN1) and NICS(MIN2) are the NICS function values in MIN1 and MIN2.

| Gas Phase             |    |      |   |   |       |       |       |            |          |           |          |                      |      |             |      |             |
|-----------------------|----|------|---|---|-------|-------|-------|------------|----------|-----------|----------|----------------------|------|-------------|------|-------------|
| DT                    | PC | T    | R | P | I     | I-    | I+    | $\Delta I$ | NICS (0) | NICS (-1) | NICS (1) | $\Delta NICS (-1,1)$ | MIN1 | NICS (MIN1) | MIN2 | NICS (MIN2) |
| pyrido[2,3]diazepines | N6 | N2-H | 6 | p | 186.9 | 93.5  | 93.5  | 0.0        | 61.0     | 33.8      | 33.8     | 0.0                  | -9.8 | 0.5         | 9.8  | 0.5         |
|                       |    | N3-H | 6 | n | -38.9 | -22.4 | -16.4 | 6.0        | 8.4      | -10.8     | -8.2     | -2.6                 | -1.2 | -11.7       | 1.3  | -9.6        |
|                       |    | N6-H | 6 | n | 91.0  | 43.2  | 47.7  | 4.5        | 43.6     | 17.6      | 19.5     | -1.9                 | -7.1 | 0.0         | 9.8  | 0.0         |
|                       |    | N2-H | 6 | p | 168.4 | 84.2  | 84.2  | 0.0        | 56.4     | 30.3      | 30.3     | 0.0                  | -9.8 | 0.5         | 9.8  | 0.5         |
|                       |    | N3-H | 6 | n | -32.8 | -19.4 | -13.4 | 5.9        | 9.3      | -9.7      | -7.2     | -2.5                 | -1.3 | -10.9       | 1.3  | -8.8        |
|                       |    | N7-H | 6 | n | 191.8 | 91.5  | 100.3 | 8.7        | 66.5     | 34.5      | 38.1     | -3.6                 | -9.8 | 0.3         | 9.8  | 0.3         |
|                       |    | N2-H | 6 | p | 198.2 | 99.1  | 99.1  | 0.0        | 63.6     | 36.2      | 36.2     | 0.0                  | -9.8 | 0.5         | 9.8  | 0.5         |
|                       |    | N3-H | 6 | p | 168.4 | 84.2  | 84.2  | 0.0        | 56.4     | 30.3      | 30.3     | 0.0                  | -9.8 | 0.5         | 9.8  | 0.5         |
|                       |    | N8-H | 6 | n | 77.0  | 34.5  | 42.5  | 7.9        | 39.8     | 13.6      | 17.3     | -3.7                 | -4.7 | -0.1        | 9.2  | 0.0         |
|                       | N9 | N2-H | 6 | n | 165.6 | 82.8  | 82.8  | 0.0        | 55.4     | 29.3      | 29.3     | 0.0                  | -9.8 | 0.5         | 9.8  | 0.5         |
|                       |    | N3-H | 6 | p | 186.9 | 93.5  | 93.5  | 0.0        | 61.0     | 33.8      | 33.8     | 0.0                  | -9.8 | 0.5         | 9.8  | 0.5         |
|                       |    | N9-H | 6 | p | 240.5 | 120.3 | 120.3 | 0.0        | 78.7     | 46.0      | 46.0     | 0.0                  | -9.8 | 0.4         | 9.8  | 0.4         |
|                       | N6 | N2-H | 7 | p | 554.0 | 277.0 | 277.0 | 0.0        | 158.7    | 113.2     | 113.2    | 0.0                  | -9.8 | 0.6         | 9.8  | 0.6         |
|                       |    | N3-H | 7 | n | 181.2 | 90.9  | 90.3  | -0.5       | 66.2     | 40.0      | 40.2     | -0.2                 | -9.8 | 0.0         | 8.0  | -0.1        |
|                       |    | N6-H | 7 | n | 127.9 | 62.0  | 65.9  | 3.9        | 50.0     | 26.1      | 27.5     | -1.4                 | -9.8 | 0.0         | 9.8  | 0.0         |
|                       | N7 | N2-H | 7 | p | 549.5 | 274.7 | 274.7 | 0.0        | 158.5    | 112.5     | 112.5    | 0.0                  | -9.8 | 0.6         | 9.8  | 0.6         |
|                       |    | N3-H | 7 | n | 210.2 | 105.5 | 104.7 | -0.8       | 74.3     | 46.0      | 45.8     | 0.2                  | -9.8 | 0.0         | 9.8  | 0.0         |
|                       |    | N7-H | 7 | n | 327.3 | 157.0 | 170.4 | 13.4       | 100.3    | 62.9      | 69.0     | -6.1                 | -9.8 | 0.3         | 9.8  | 0.4         |
|                       | N8 | N2-H | 7 | p | 582.1 | 291.1 | 291.1 | 0.0        | 166.5    | 118.8     | 118.8    | 0.0                  | -9.8 | 0.6         | 9.8  | 0.6         |
|                       |    | N3-H | 7 | p | 549.5 | 274.7 | 274.7 | 0.0        | 158.5    | 112.5     | 112.5    | 0.0                  | -9.8 | 0.6         | 9.8  | 0.6         |
|                       |    | N8-H | 7 | n | 118.8 | 57.7  | 61.1  | 3.4        | 48.2     | 24.4      | 25.5     | -1.1                 | -9.8 | 0.0         | 9.8  | 0.0         |
|                       | N9 | N2-H | 7 | n | 543.7 | 271.9 | 271.9 | 0.0        | 156.4    | 111.3     | 111.3    | 0.0                  | -9.8 | 0.6         | 9.8  | 0.6         |
|                       |    | N3-H | 6 | p | 554.0 | 277.0 | 277.0 | 0.0        | 158.7    | 113.2     | 113.2    | 0.0                  | -9.8 | 0.6         | 9.8  | 0.6         |
|                       |    | N9-H | 7 | p | 392.9 | 196.5 | 196.5 | 0.0        | 116.5    | 79.1      | 79.1     | 0.0                  | -9.8 | 0.5         | 9.8  | 0.5         |

**Table S11.** Different NICS aromaticity indices of ring in pyrido[2,4]diazepines in the gas phase. DT – diazepine type, PC - pyridine condensation type, T – tautomer type, R -ring type, P – planarity (p- planar; n- non-planar), I – integral NICS (INICS. ppm/Å), I- – integral NICS for the distances below the plane (ppm/Å), I+ – integral NICS for the distances above the plane (ppm/Å),  $\Delta I = I(-) - I(+)$  (ppm/Å); NICS(0), NICS(1), NICS(-1), and  $\Delta NICS(-1,1) = NICS(-1) - NICS(1)$  (ppm). MIN1 and MIN2 are minima of the NICS function for distances below and above the ring plane, respectively, and NICS(MIN1) and NICS(MIN2) are the NICS function values in MIN1 and MIN2.

| Gas Phase             |    |      |   |   |       |       |       |            |             |              |             |                         |      |                |      |                |
|-----------------------|----|------|---|---|-------|-------|-------|------------|-------------|--------------|-------------|-------------------------|------|----------------|------|----------------|
| DT                    | PC | T    | R | P | I     | I-    | I+    | $\Delta I$ | NICS<br>(0) | NICS<br>(-1) | NICS<br>(1) | $\Delta NICS$<br>(-1,1) | MIN1 | NICS<br>(MIN1) | MIN2 | NICS<br>(MIN2) |
| pyrido[2,4]diazepines | N6 | N2-H | 6 | p | 808.0 | 404.0 | 404.0 | 0.0        | 223.1       | 162.8        | 162.8       | 0.0                     | -9.8 | 1.0            | 9.8  | 1.0            |
|                       |    | N4-H | 6 | n | 651.9 | 324.6 | 327.3 | 2.6        | 183.9       | 131.5        | 132.2       | -0.7                    | -9.8 | 0.8            | 9.8  | 0.8            |
|                       |    | N6-H | 6 | p | 278.7 | 137.7 | 141.0 | 3.3        | 87.1        | 55.7         | 55.8        | -0.1                    | -9.8 | 0.3            | 9.8  | 0.3            |
|                       |    | N2-H | 6 | p | 820.6 | 410.3 | 410.3 | 0.0        | 227.2       | 165.5        | 165.5       | 0.0                     | -9.8 | 1.1            | 9.8  | 1.1            |
|                       |    | N4-H | 6 | p | 913.7 | 456.9 | 456.9 | 0.0        | 250.3       | 183.6        | 183.6       | 0.0                     | -9.8 | 1.2            | 9.8  | 1.2            |
|                       |    | N7-H | 6 | n | 252.1 | 124.4 | 127.7 | 3.3        | 81.3        | 50.6         | 50.9        | -0.3                    | -9.8 | 0.2            | 9.8  | 0.3            |
|                       |    | N2-H | 6 | p | 913.7 | 456.9 | 456.9 | 0.0        | 250.3       | 183.6        | 183.6       | 0.0                     | -9.8 | 1.2            | 9.8  | 1.2            |
|                       |    | N4-H | 6 | p | 820.6 | 410.3 | 410.3 | 0.0        | 227.2       | 165.5        | 165.5       | 0.0                     | -9.8 | 1.1            | 9.8  | 1.1            |
|                       |    | N8-H | 6 | n | 252.1 | 124.4 | 127.7 | 3.3        | 81.3        | 50.6         | 50.9        | -0.3                    | -9.8 | 0.2            | 9.8  | 0.3            |
|                       | N9 | N2-H | 6 | n | 651.9 | 324.6 | 327.3 | 2.6        | 183.9       | 131.5        | 132.2       | -0.7                    | -9.8 | 0.8            | 9.8  | 0.8            |
|                       |    | N4-H | 6 | p | 807.9 | 404.0 | 404.0 | 0.0        | 223.0       | 162.8        | 162.8       | 0.0                     | -9.8 | 1.0            | 9.8  | 1.0            |
|                       |    | N9-H | 6 | p | 278.7 | 137.7 | 141.0 | 3.3        | 87.1        | 55.7         | 55.8        | -0.1                    | -9.8 | 0.3            | 9.8  | 0.3            |
|                       | N6 | N2-H | 7 | p | 325.1 | 162.5 | 162.5 | 0.0        | 92.5        | 59.8         | 59.8        | 0.0                     | -9.8 | 0.9            | 9.8  | 0.9            |
|                       |    | N4-H | 7 | n | 246.4 | 116.7 | 129.7 | 13.0       | 73.9        | 42.6         | 47.6        | -5.1                    | -9.8 | 0.6            | 9.8  | 0.7            |
|                       |    | N6-H | 7 | p | 230.5 | 112.7 | 117.8 | 5.1        | 78.2        | 45.0         | 46.8        | -1.8                    | -9.8 | 0.3            | 9.8  | 0.3            |
|                       | N7 | N2-H | 7 | p | 331.3 | 165.6 | 165.6 | 0.0        | 94.5        | 61.8         | 61.8        | 0.0                     | -9.8 | 0.9            | 9.8  | 0.9            |
|                       |    | N4-H | 7 | p | 383.9 | 192.0 | 192.0 | 0.0        | 106.7       | 71.6         | 71.6        | 0.0                     | -9.8 | 1.1            | 9.8  | 1.1            |
|                       |    | N7-H | 7 | n | 187.4 | 88.8  | 98.5  | 9.7        | 66.8        | 34.6         | 39.0        | -4.5                    | -9.8 | 0.2            | 9.8  | 0.2            |
|                       | N8 | N2-H | 7 | p | 383.9 | 192.0 | 192.0 | 0.0        | 106.7       | 71.6         | 71.6        | 0.0                     | -9.8 | 1.1            | 9.8  | 1.1            |
|                       |    | N4-H | 7 | p | 331.3 | 165.6 | 165.6 | 0.0        | 94.5        | 61.8         | 61.8        | 0.0                     | -9.8 | 0.9            | 9.8  | 0.9            |
|                       |    | N8-H | 7 | n | 187.4 | 88.8  | 98.5  | 9.7        | 66.8        | 34.6         | 39.0        | -4.5                    | -9.8 | 0.2            | 9.8  | 0.2            |
|                       | N9 | N2-H | 7 | n | 246.4 | 116.7 | 129.7 | 13.0       | 73.9        | 42.6         | 47.6        | -5.1                    | -9.8 | 0.6            | 9.8  | 0.7            |
|                       |    | N4-H | 7 | p | 325.2 | 162.6 | 162.6 | 0.0        | 92.6        | 59.9         | 59.9        | 0.0                     | -9.8 | 0.9            | 9.8  | 0.9            |
|                       |    | N9-H | 7 | p | 230.5 | 112.7 | 117.8 | 5.1        | 78.2        | 45.0         | 46.8        | -1.8                    | -9.8 | 0.3            | 9.8  | 0.3            |

**Table S12.** Different NICS aromaticity indices of ring in pyrido[1,2]diazepines in the water phase. DT – diazepine type, PC - pyridine condensation type, T – tautomer type, R -ring type, P – planarity (p- planar; n- non-planar), I – integral NICS (INICS. ppm/Å), I- – integral NICS for the distances below the plane (ppm/Å), I+ – integral NICS for the distances above the plane (ppm/Å),  $\Delta I = I(-) - I(+)$  (ppm/Å); NICS(0), NICS(1), NICS(-1), and  $\Delta NICS(-1,1) = NICS(-1) - NICS(1)$  (ppm). MIN1 and MIN2 are minima of the NICS function for distances below and above the ring plane, respectively, and NICS(MIN1) and NICS(MIN2) are the NICS function values in MIN1 and MIN2.

| Water Phase           |    |      |   |   |        |       |       |       |             |              |             |                 |      |                |      |                |
|-----------------------|----|------|---|---|--------|-------|-------|-------|-------------|--------------|-------------|-----------------|------|----------------|------|----------------|
| DT                    | PC | T    | R | P | I      | I-    | I+    | ΔI    | NICS<br>(0) | NICS<br>(-1) | NICS<br>(1) | ΔNICS<br>(-1,1) | MIN1 | NICS<br>(MIN1) | MIN2 | NICS<br>(MIN2) |
| pyrido[1,2]diazepines | N6 | N1-H | 6 | n | -100.0 | -46.8 | -53.1 | -6.3  | -6.4        | -19.4        | -22.5       | 3.1             | -1.1 | -19.5          | 1.0  | -22.5          |
|                       |    | N2-H | 6 | n | 168.1  | 84.0  | 84.0  | 0.0   | 54.2        | 29.1         | 29.1        | 0.0             | -9.8 | 0.5            | 9.8  | 0.5            |
|                       |    | N6-H | 6 | n | 83.0   | 47.4  | 35.6  | -11.9 | 40.8        | 19.1         | 14.2        | 4.9             | -9.8 | 0.0            | 4.2  | -0.1           |
|                       | N7 | N1-H | 6 | n | -85.4  | -39.2 | -46.1 | -6.9  | -3.4        | -16.5        | -19.7       | 3.2             | -1.1 | -16.7          | 1.0  | -19.7          |
|                       |    | N2-H | 6 | n | 183.5  | 91.8  | 91.8  | 0.0   | 58.5        | 33.1         | 33.1        | 0.0             | -9.8 | 0.5            | 9.8  | 0.5            |
|                       |    | N7-H | 6 | n | 91.1   | 41.9  | 49.2  | 7.4   | 41.4        | 15.2         | 19.4        | -4.2            | -9.8 | 0.1            | 9.8  | 0.1            |
|                       | N8 | N1-H | 6 | n | -100.2 | -46.8 | -53.5 | -6.7  | -7.0        | -19.4        | -22.6       | 3.2             | -1.1 | -19.5          | 1.0  | -22.6          |
|                       |    | N2-H | 6 | n | 179.0  | 89.5  | 89.5  | 0.0   | 57.0        | 31.6         | 31.6        | 0.0             | -9.8 | 0.6            | 9.8  | 0.6            |
|                       |    | N8-H | 6 | n | 76.6   | 28.6  | 48.0  | 19.4  | 39.0        | 10.7         | 19.6        | -8.9            | -3.4 | -0.3           | 9.8  | 0.0            |
|                       | N9 | N1-H | 6 | n | -86.8  | -40.7 | -46.1 | -5.4  | -3.0        | -17.0        | -19.4       | 2.4             | -1.1 | -17.3          | 1.1  | -19.4          |
|                       |    | N2-H | 6 | n | 190.0  | 95.0  | 95.0  | 0.0   | 60.1        | 34.1         | 34.1        | 0.0             | -9.8 | 0.5            | 9.8  | 0.5            |
|                       |    | N9-H | 6 | n | 158.0  | 79.0  | 79.0  | 0.0   | 57.4        | 30.0         | 30.0        | 0.0             | -9.8 | 0.3            | 9.8  | 0.3            |
|                       | N6 | N1-H | 7 | n | 55.3   | 27.1  | 28.2  | 1.1   | 33.8        | 15.8         | 14.9        | 0.9             | -3.5 | -1.7           | 3.3  | -1.2           |
|                       |    | N2-H | 7 | n | 601.4  | 300.7 | 300.7 | 0.0   | 171.1       | 123.0        | 123.0       | 0.0             | -9.8 | 0.6            | 9.8  | 0.6            |
|                       |    | N6-H | 7 | n | 160.5  | 79.8  | 80.7  | 0.9   | 56.9        | 32.8         | 34.3        | -1.5            | -9.8 | 0.0            | 9.8  | 0.1            |
|                       | N7 | N1-H | 7 | n | 81.0   | 40.7  | 40.2  | -0.5  | 40.9        | 21.0         | 19.6        | 1.3             | -4.1 | -1.1           | 4.0  | -0.7           |
|                       |    | N2-H | 7 | n | 595.0  | 297.5 | 297.5 | 0.0   | 170.2       | 121.6        | 121.6       | 0.0             | -9.8 | 0.6            | 9.8  | 0.6            |
|                       |    | N7-H | 7 | n | 209.3  | 104.1 | 105.2 | 1.1   | 71.6        | 43.4         | 43.3        | 0.1             | -9.8 | 0.1            | 9.8  | 0.1            |
|                       | N8 | N1-H | 7 | n | 58.9   | 29.3  | 29.5  | 0.2   | 35.2        | 16.7         | 15.3        | 1.3             | -3.6 | -1.6           | 3.4  | -1.2           |
|                       |    | N2-H | 7 | n | 619.2  | 309.6 | 309.6 | 0.0   | 176.3       | 126.5        | 126.5       | 0.0             | -9.8 | 0.7            | 9.8  | 0.7            |
|                       |    | N8-H | 7 | n | 154.7  | 78.8  | 75.9  | -2.8  | 55.4        | 33.6         | 30.8        | 2.8             | -9.8 | 0.1            | 9.8  | 0.0            |
|                       | N9 | N1-H | 7 | n | 68.1   | 34.3  | 33.8  | -0.5  | 37.1        | 18.6         | 17.0        | 1.6             | -3.8 | -1.3           | 3.7  | -0.9           |
|                       |    | N2-H | 7 | n | 599.1  | 299.5 | 299.5 | 0.0   | 170.5       | 122.3        | 122.3       | 0.0             | -9.8 | 0.7            | 9.8  | 0.7            |
|                       |    | N9-H | 7 | n | 330.3  | 165.2 | 165.2 | 0.0   | 101.9       | 67.5         | 67.5        | 0.0             | -9.8 | 0.3            | 9.8  | 0.3            |

**Table S13.** Different NICS aromaticity indices of ring in pyrido[1,3]diazepines in the water phase. DT – diazepine type, PC - pyridine condensation type, T – tautomer type, R -ring type, P – planarity (p- planar; n- non-planar), I – integral NICS (INICS. ppm/Å), I- – integral NICS for the distances below the plane (ppm/Å), I+ – integral NICS for the distances above the plane (ppm/Å),  $\Delta I = I(-) - I(+)$  (ppm/Å); NICS(0), NICS(1), NICS(-1), and  $\Delta NICS(-1,1) = NICS(-1) - NICS(1)$  (ppm). MIN1 and MIN2 are minima of the NICS function for distances below and above the ring plane, respectively, and NICS(MIN1) and NICS(MIN2) are the NICS function values in MIN1 and MIN2.

| Water Phase           |    |      |   |   |       |       |       |            |             |              |             |                         |      |                |      |                |
|-----------------------|----|------|---|---|-------|-------|-------|------------|-------------|--------------|-------------|-------------------------|------|----------------|------|----------------|
| DT                    | PC | T    | R | P | I     | I-    | I+    | $\Delta I$ | NICS<br>(0) | NICS<br>(-1) | NICS<br>(1) | $\Delta NICS$<br>(-1,1) | MIN1 | NICS<br>(MIN1) | MIN2 | NICS<br>(MIN2) |
| pyrido[1,3]diazepines | N6 | N1-H | 6 | n | -85.0 | -46.0 | -39.0 | 7.0        | -3.0        | -19.9        | -16.7       | -3.1                    | -1.0 | -19.9          | 1.1  | -17.0          |
|                       |    | N3-H | 6 | n | -50.9 | -22.6 | -28.3 | -5.7       | 4.8         | -10.8        | -13.0       | 2.2                     | -1.2 | -11.6          | 1.2  | -13.6          |
|                       |    | N6-H | 6 | p | 120.8 | 63.1  | 57.7  | -5.5       | 48.5        | 23.4         | 21.9        | 1.5                     | -9.8 | 0.2            | 9.8  | 0.1            |
|                       |    | N1-H | 6 | n | -78.4 | -42.9 | -35.6 | 7.3        | -1.9        | -18.5        | -15.3       | -3.2                    | -1.1 | -18.6          | 1.1  | -15.6          |
|                       |    | N3-H | 6 | p | -31.4 | -15.7 | -15.7 | 0.0        | 9.0         | -8.0         | -8.0        | 0.0                     | -1.3 | -9.4           | 1.3  | -9.4           |
|                       |    | N7-H | 6 | p | 106.0 | 55.6  | 50.5  | -5.1       | 44.5        | 20.6         | 17.9        | 2.7                     | -9.8 | 0.2            | 9.8  | 0.1            |
|                       |    | N1-H | 6 | n | -85.3 | -46.5 | -38.9 | 7.6        | -3.6        | -20.0        | -16.6       | -3.4                    | -1.0 | -20.0          | 1.1  | -16.9          |
|                       |    | N3-H | 6 | p | -38.3 | -17.1 | -21.1 | -4.0       | 7.5         | -8.5         | -10.1       | 1.6                     | -1.3 | -9.8           | 1.3  | -11.2          |
|                       |    | N8-H | 6 | p | 129.1 | 69.9  | 59.2  | -10.7      | 50.3        | 25.6         | 21.8        | 3.8                     | -9.8 | 0.2            | 9.8  | 0.2            |
|                       | N9 | N1-H | 6 | n | -74.8 | -34.6 | -40.2 | -5.7       | -0.3        | -15.0        | -17.3       | 2.3                     | -1.1 | -15.3          | 1.1  | -17.5          |
|                       |    | N3-H | 6 | n | -73.0 | -33.1 | -39.8 | -6.7       | -0.2        | -14.7        | -17.2       | 2.5                     | -1.1 | -15.0          | 1.1  | -17.4          |
|                       |    | N9-H | 6 | p | 278.3 | 139.1 | 139.1 | 0.0        | 89.9        | 57.7         | 57.7        | 0.0                     | -9.8 | 0.2            | 9.8  | 0.2            |
|                       | N6 | N1-H | 7 | n | 94.6  | 46.5  | 48.1  | 1.6        | 44.5        | 22.0         | 24.2        | -2.2                    | -4.6 | -0.5           | 4.3  | -0.9           |
|                       |    | N3-H | 7 | n | 176.8 | 88.1  | 88.7  | 0.6        | 65.8        | 39.5         | 39.4        | 0.1                     | -7.4 | -0.1           | 8.3  | -0.1           |
|                       |    | N6-H | 7 | p | 280.9 | 143.1 | 137.8 | -5.4       | 89.8        | 59.2         | 56.8        | 2.4                     | -9.8 | 0.2            | 9.8  | 0.2            |
|                       | N7 | N1-H | 7 | n | 107.6 | 52.7  | 54.9  | 2.2        | 48.4        | 24.5         | 26.7        | -2.3                    | -4.9 | -0.4           | 4.7  | -0.7           |
|                       |    | N3-H | 7 | p | 214.0 | 107.0 | 107.0 | 0.0        | 76.0        | 46.8         | 46.8        | 0.0                     | -9.8 | 0.0            | 9.8  | 0.0            |
|                       |    | N7-H | 7 | p | 265.1 | 133.1 | 132.0 | -1.1       | 86.1        | 54.9         | 54.8        | 0.0                     | -9.8 | 0.2            | 9.8  | 0.2            |
|                       | N8 | N1-H | 7 | n | 99.0  | 48.4  | 50.7  | 2.3        | 46.3        | 22.7         | 25.2        | -2.5                    | -4.6 | -0.5           | 4.4  | -0.8           |
|                       |    | N3-H | 7 | p | 204.0 | 101.7 | 102.3 | 0.6        | 73.4        | 44.7         | 44.9        | -0.2                    | -9.5 | 0.0            | 9.8  | 0.0            |
|                       |    | N8-H | 7 | p | 293.0 | 149.7 | 143.4 | -6.3       | 92.7        | 61.4         | 58.8        | 2.6                     | -9.8 | 0.3            | 9.8  | 0.2            |
|                       | N9 | N1-H | 7 | n | 102.5 | 52.6  | 49.9  | -2.7       | 46.6        | 25.9         | 23.2        | 2.7                     | -4.6 | -0.7           | 4.8  | -0.4           |
|                       |    | N3-H | 7 | n | 128.1 | 63.7  | 64.4  | 0.7        | 53.4        | 30.0         | 29.6        | 0.5                     | -5.3 | -0.5           | 5.9  | -0.2           |
|                       |    | N9-H | 7 | p | 114.4 | 57.2  | 57.2  | -0.0       | 47.0        | 21.3         | 21.3        | 0.0                     | -9.8 | 0.2            | 9.8  | 0.2            |

**Table S14.** Different NICS aromaticity indices of ring in pyrido[1,4]diazepines in the water phase. DT – diazepine type, PC - pyridine condensation type, T – tautomer type, R -ring type, P – planarity (p- planar; n- non-planar), I – integral NICS (INICS. ppm/Å), I- – integral NICS for the distances below the plane (ppm/Å), I+ – integral NICS for the distances above the plane (ppm/Å),  $\Delta I = I(-) - I(+)$  (ppm/Å); NICS(0), NICS(1), NICS(-1), and  $\Delta NICS(-1,1) = NICS(-1) - NICS(1)$  (ppm). MIN1 and MIN2 are minima of the NICS function for distances below and above the ring plane, respectively, and NICS(MIN1) and NICS(MIN2) are the NICS function values in MIN1 and MIN2.

| Water Phase            |    |      |   |   |       |       |       |            |          |           |          |                      |      |             |      |             |
|------------------------|----|------|---|---|-------|-------|-------|------------|----------|-----------|----------|----------------------|------|-------------|------|-------------|
| DT                     | PC | T    | R | P | I     | I-    | I+    | $\Delta I$ | NICS (0) | NICS (-1) | NICS (1) | $\Delta NICS (-1,1)$ | MIN1 | NICS (MIN1) | MIN2 | NICS (MIN2) |
| pyrido [1,4]diazepines | N6 | N1-H | 6 | n | -71.0 | -31.5 | -39.5 | -3.7       | -0.4     | -14.1     | -17.8    | 3.7                  | -1.2 | -14.5       | 1.1  | -17.8       |
|                        |    | N4-H | 6 | n | 356.1 | 174.1 | 182.0 | 3.7        | 109.1    | 71.8      | 75.5     | -3.7                 | -9.8 | 0.3         | 9.8  | 0.3         |
|                        |    | N6-H | 6 | n | 242.4 | 124.8 | 117.6 | -1.9       | 77.4     | 46.6      | 44.8     | 1.9                  | -9.8 | 0.5         | 9.8  | 0.4         |
|                        |    | N1-H | 6 | n | -43.1 | -17.7 | -25.4 | -3.5       | 6.1      | -8.5      | -12.0    | 3.5                  | -1.3 | -9.8        | 1.2  | -12.7       |
|                        |    | N4-H | 6 | p | 360.4 | 180.2 | 180.2 | 0.0        | 99.3     | 66.8      | 66.8     | 0.0                  | -9.8 | 1.0         | 9.8  | 1.0         |
|                        |    | N7-H | 6 | n | 136.5 | 64.9  | 71.5  | 3.5        | 52.0     | 23.5      | 26.9     | -3.5                 | -9.8 | 0.2         | 9.8  | 0.2         |
|                        |    | N1-H | 6 | n | -71.4 | -31.1 | -40.3 | -4.3       | -1.1     | -13.8     | -18.1    | 4.3                  | -1.2 | -14.2       | 1.1  | -18.1       |
|                        |    | N4-H | 6 | n | 118.8 | 61.5  | 57.3  | -2.7       | 45.4     | 23.5      | 20.8     | 2.7                  | -9.8 | 0.2         | 9.8  | 0.2         |
|                        |    | N4-H | 6 | p | 241.3 | 120.7 | 120.7 | 0.0        | 71.6     | 43.5      | 43.5     | 0.0                  | -9.8 | 0.7         | 9.8  | 0.7         |
|                        |    | N8-H | 6 | p | 302.3 | 151.2 | 151.2 | 0.0        | 90.6     | 55.7      | 55.7     | 0.0                  | -9.8 | 0.7         | 9.8  | 0.7         |
|                        |    | N1-H | 6 | n | -55.1 | -24.0 | -31.0 | -3.2       | 4.0      | -10.8     | -13.9    | 3.2                  | -1.2 | -11.7       | 1.2  | -14.3       |
|                        |    | N4-H | 6 | n | 410.1 | 201.7 | 208.5 | 3.4        | 122.7    | 82.6      | 86.0     | -3.4                 | -9.8 | 0.4         | 9.8  | 0.4         |
|                        | N7 | N4-H | 6 | p | 340.1 | 170.0 | 170.0 | 0.0        | 94.8     | 62.7      | 62.7     | 0.0                  | -9.8 | 1.0         | 9.8  | 1.0         |
|                        |    | N9-H | 6 | p | 161.2 | 80.6  | 80.6  | 0.0        | 58.3     | 30.6      | 30.6     | 0.0                  | -9.8 | 0.3         | 9.8  | 0.3         |
|                        |    | N1-H | 7 | n | 134.4 | 66.5  | 67.9  | -0.9       | 54.7     | 31.3      | 30.5     | 0.9                  | -5.3 | -0.4        | 6.8  | -0.1        |
|                        |    | N4-H | 7 | n | 114.0 | 59.5  | 54.5  | -3.1       | 44.6     | 22.6      | 19.5     | 3.1                  | -9.8 | 0.2         | 9.8  | 0.2         |
|                        |    | N6-H | 7 | n | 466.9 | 235.7 | 231.3 | -1.0       | 135.3    | 94.6      | 93.6     | 1.0                  | -9.8 | 0.6         | 9.8  | 0.5         |
|                        |    | N1-H | 7 | n | 177.4 | 88.1  | 89.3  | -0.3       | 66.0     | 39.4      | 39.1     | 0.3                  | -7.4 | -0.1        | 9.8  | 0.0         |
|                        |    | N4-H | 7 | p | 895.8 | 447.9 | 447.9 | 0.0        | 245.2    | 180.9     | 180.9    | 0.0                  | -9.8 | 1.2         | 9.8  | 1.2         |
|                        |    | N7-H | 7 | n | 307.7 | 155.5 | 152.2 | -2.4       | 95.9     | 64.4      | 62.0     | 2.4                  | -9.8 | 0.3         | 9.8  | 0.3         |
|                        |    | N1-H | 7 | n | 137.8 | 68.5  | 69.3  | -1.1       | 56.2     | 32.1      | 31.0     | 1.1                  | -5.3 | -0.4        | 6.8  | -0.1        |
|                        |    | N4-H | 7 | n | 376.2 | 184.7 | 191.5 | 3.2        | 115.0    | 76.1      | 79.3     | -3.2                 | -9.8 | 0.3         | 9.8  | 0.3         |
|                        |    | N4-H | 7 | p | 735.0 | 367.5 | 367.5 | 0.0        | 205.8    | 149.3     | 149.3    | 0.0                  | -9.8 | 0.9         | 9.8  | 0.9         |
|                        |    | N8-H | 7 | p | 591.3 | 295.6 | 295.6 | 0.0        | 165.9    | 118.6     | 118.6    | 0.0                  | -9.8 | 0.8         | 9.8  | 0.8         |
|                        | N8 | N1-H | 7 | n | 137.3 | 68.2  | 69.2  | -0.8       | 55.3     | 31.8      | 31.0     | 0.8                  | -5.6 | -0.3        | 6.8  | -0.1        |
|                        |    | N4-H | 7 | n | 157.3 | 80.8  | 76.6  | -2.8       | 54.9     | 31.3      | 28.6     | 2.8                  | -9.8 | 0.3         | 9.8  | 0.3         |
|                        |    | N4-H | 7 | p | 852.1 | 426.1 | 426.1 | 0.0        | 233.8    | 172.0     | 172.0    | 0.0                  | -9.8 | 1.1         | 9.8  | 1.1         |
|                        |    | N9-H | 7 | p | 336.4 | 168.2 | 168.2 | 0.0        | 103.3    | 68.9      | 68.9     | 0.0                  | -9.8 | 0.3         | 9.8  | 0.3         |



**Table S15.** Different NICS aromaticity indices of ring in pyrido[1,5]diazepines in the water phase. DT – diazepine type, PC - pyridine condensation type, T – tautomer type, R -ring type, P – planarity (p- planar; n- non-planar), I – integral NICS (INICS. ppm/Å), I- – integral NICS for the distances below the plane (ppm/Å), I+ – integral NICS for the distances above the plane (ppm/Å),  $\Delta I = I(-) - I(+)$  (ppm/Å); NICS(0), NICS(1), NICS(-1), and  $\Delta NICS(-1,1) = NICS(-1) - NICS(1)$  (ppm). MIN1 and MIN2 are minima of the NICS function for distances below and above the ring plane, respectively, and NICS(MIN1) and NICS(MIN2) are the NICS function values in MIN1 and MIN2.

| Water Phase           |    |      |   |   |       |       |       |            |          |           |          |                      |      |             |      |             |
|-----------------------|----|------|---|---|-------|-------|-------|------------|----------|-----------|----------|----------------------|------|-------------|------|-------------|
| DT                    | PC | T    | R | P | I     | I-    | I+    | $\Delta I$ | NICS (0) | NICS (-1) | NICS (1) | $\Delta NICS (-1,1)$ | MIN1 | NICS (MIN1) | MIN2 | NICS (MIN2) |
| pyrido[1,5]diazepines | N6 | N1-H | 6 | n | -74.5 | -32.7 | -41.8 | -9.0       | -2.1     | -14.8     | -18.3    | 3.6                  | -1.1 | -15.0       | 1.1  | -18.4       |
|                       |    | N5-H | 6 | n | -58.3 | -24.9 | -33.4 | -8.6       | 2.3      | -11.6     | -15.0    | 3.3                  | -1.2 | -12.2       | 1.1  | -15.3       |
|                       |    | N6-H | 6 | p | 128.1 | 64.0  | 64.0  | 0.0        | 48.3     | 23.1      | 23.1     | 0.0                  | -9.8 | 0.3         | 9.8  | 0.3         |
|                       |    | N1-H | 6 | n | -47.9 | -19.3 | -28.6 | -9.3       | 4.0      | -9.6      | -13.4    | 3.8                  | -1.2 | -10.4       | 1.2  | -13.8       |
|                       |    | N5-H | 6 | n | -66.0 | -27.6 | -38.4 | -10.8      | -0.7     | -12.7     | -17.2    | 4.5                  | -1.2 | -13.1       | 1.1  | -17.3       |
|                       |    | N7-H | 6 | p | 143.2 | 71.6  | 71.6  | 0.0        | 51.2     | 25.0      | 25.0     | 0.0                  | -9.8 | 0.3         | 9.8  | 0.3         |
|                       |    | N1-H | 6 | n | -66.0 | -27.6 | -38.4 | -10.8      | -0.7     | -12.7     | -17.2    | 4.5                  | -1.2 | -13.1       | 1.1  | -17.3       |
|                       |    | N5-H | 6 | n | -47.9 | -19.3 | -28.6 | -9.3       | 4.0      | -9.6      | -13.4    | 3.8                  | -1.2 | -10.4       | 1.2  | -13.8       |
|                       |    | N8-H | 6 | p | 143.2 | 71.6  | 71.6  | 0.0        | 51.2     | 25.0      | 25.0     | 0.0                  | -9.8 | 0.3         | 9.8  | 0.3         |
|                       |    | N1-H | 6 | n | -58.3 | -24.9 | -33.4 | -8.6       | 2.3      | -11.6     | -15.0    | 3.3                  | -1.2 | -12.2       | 1.1  | -15.3       |
|                       |    | N5-H | 6 | n | -74.5 | -32.7 | -41.8 | -9.0       | -2.1     | -14.8     | -18.3    | 3.6                  | -1.1 | -15.0       | 1.1  | -18.4       |
|                       |    | N9-H | 6 | p | 128.1 | 64.0  | 64.0  | 0.0        | 48.3     | 23.1      | 23.1     | 0.0                  | -9.8 | 0.3         | 9.8  | 0.3         |
|                       | N6 | N1-H | 7 | n | 136.8 | 66.9  | 69.9  | 3.0        | 55.7     | 31.5      | 31.5     | 0.0                  | -5.3 | -0.4        | 6.8  | -0.1        |
|                       |    | N5-H | 7 | n | 156.1 | 77.2  | 78.9  | 1.7        | 60.4     | 35.5      | 35.1     | 0.4                  | -5.9 | -0.2        | 8.0  | -0.1        |
|                       |    | N6-H | 7 | p | 356.8 | 178.4 | 178.4 | 0.0        | 109.3    | 73.6      | 73.6     | 0.0                  | -9.8 | 0.3         | 9.8  | 0.3         |
|                       |    | N1-H | 7 | n | 191.1 | 94.5  | 96.6  | 2.1        | 70.0     | 42.1      | 42.3     | -0.2                 | -8.0 | -0.1        | 9.8  | 0.0         |
|                       |    | N5-H | 7 | n | 161.3 | 79.3  | 82.0  | 2.8        | 62.5     | 36.2      | 36.5     | -0.2                 | -6.2 | -0.2        | 8.3  | -0.1        |
|                       |    | N7-H | 7 | p | 398.9 | 199.4 | 199.4 | 0.0        | 119.2    | 81.8      | 81.8     | 0.0                  | -9.8 | 0.4         | 9.8  | 0.4         |
|                       |    | N1-H | 7 | n | 161.3 | 79.3  | 82.0  | 2.8        | 62.5     | 36.2      | 36.5     | -0.2                 | -6.2 | -0.2        | 8.3  | -0.1        |
|                       |    | N5-H | 7 | n | 191.1 | 94.5  | 96.6  | 2.1        | 70.0     | 42.1      | 42.3     | -0.2                 | -8.0 | -0.1        | 9.8  | 0.0         |
|                       |    | N8-H | 7 | p | 398.9 | 199.4 | 199.4 | 0.0        | 119.2    | 81.8      | 81.8     | 0.0                  | -9.8 | 0.4         | 9.8  | 0.4         |
|                       |    | N1-H | 7 | n | 156.1 | 77.2  | 78.9  | 1.7        | 60.4     | 35.5      | 35.1     | 0.4                  | -5.9 | -0.2        | 8.0  | -0.1        |
|                       |    | N5-H | 7 | n | 136.8 | 66.9  | 69.9  | 3.0        | 55.7     | 31.5      | 31.5     | 0.0                  | -5.3 | -0.4        | 6.8  | -0.1        |
|                       |    | N9-H | 7 | p | 356.8 | 178.4 | 178.4 | 0.0        | 109.3    | 73.6      | 73.6     | 0.0                  | -9.8 | 0.3         | 9.8  | 0.3         |

**Table S16.** Different NICS aromaticity indices of ring in pyrido[2,3]diazepines in the water phase. DT – diazepine type, PC - pyridine condensation type, T – tautomer type, R -ring type, P – planarity (p- planar; n- non-planar), I – integral NICS (INICS. ppm/Å), I- – integral NICS for the distances below the plane (ppm/Å), I+ – integral NICS for the distances above the plane (ppm/Å),  $\Delta I = I(-) - I(+)$  (ppm/Å); NICS(0), NICS(1), NICS(-1), and  $\Delta NICS(-1,1) = NICS(-1) - NICS(1)$  (ppm). MIN1 and MIN2 are minima of the NICS function for distances below and above the ring plane, respectively, and NICS(MIN1) and NICS(MIN2) are the NICS function values in MIN1 and MIN2.

| Water Phase           |    |      |   |   |       |       |       |            |          |           |          |                      |      |             |      |             |
|-----------------------|----|------|---|---|-------|-------|-------|------------|----------|-----------|----------|----------------------|------|-------------|------|-------------|
| DT                    | PC | T    | R | P | I     | I-    | I+    | $\Delta I$ | NICS (0) | NICS (-1) | NICS (1) | $\Delta NICS (-1,1)$ | MIN1 | NICS (MIN1) | MIN2 | NICS (MIN2) |
| pyrido[2,3]diazepines | N6 | N2-H | 6 | p | 196.1 | 98.0  | 98.0  | 0.0        | 63.1     | 35.6      | 35.6     | 0.0                  | -9.8 | 0.5         | 9.8  | 0.5         |
|                       |    | N3-H | 6 | n | -37.7 | -22.0 | -15.8 | 6.2        | 8.7      | -10.6     | -7.9     | -2.7                 | -1.3 | -11.6       | 1.3  | -9.4        |
|                       |    | N6-H | 6 | n | 102.6 | 48.9  | 53.7  | 4.8        | 46.1     | 19.4      | 21.3     | -1.9                 | -9.8 | 0.0         | 9.8  | 0.1         |
|                       |    | N2-H | 6 | p | 174.8 | 87.4  | 87.4  | 0.0        | 57.8     | 31.3      | 31.3     | 0.0                  | -9.8 | 0.5         | 9.8  | 0.5         |
|                       |    | N3-H | 6 | n | -24.0 | -14.8 | -9.2  | 5.6        | 11.4     | -8.0      | -5.6     | -2.4                 | -1.3 | -9.5        | 1.4  | -7.6        |
|                       |    | N7-H | 6 | n | 291.4 | 145.6 | 145.8 | 0.3        | 89.8     | 53.9      | 54.0     | -0.1                 | -9.8 | 0.6         | 9.8  | 0.6         |
|                       |    | N2-H | 6 | p | 213.4 | 106.7 | 106.7 | 0.0        | 67.0     | 39.0      | 39.0     | 0.0                  | -9.8 | 0.6         | 9.8  | 0.6         |
|                       |    | N3-H | 6 | p | 174.8 | 87.4  | 87.4  | 0.0        | 57.8     | 31.3      | 31.3     | 0.0                  | -9.8 | 0.5         | 9.8  | 0.5         |
|                       |    | N8-H | 6 | n | 86.3  | 39.0  | 47.2  | 8.2        | 41.8     | 14.9      | 18.6     | -3.7                 | -9.8 | 0.0         | 9.8  | 0.0         |
|                       | N9 | N2-H | 6 | p | 165.8 | 82.9  | 82.9  | 0.0        | 55.4     | 29.2      | 29.2     | 0.0                  | -9.8 | 0.5         | 9.8  | 0.5         |
|                       |    | N3-H | 6 | p | 196.1 | 98.0  | 98.0  | 0.0        | 63.1     | 35.6      | 35.6     | 0.0                  | -9.8 | 0.5         | 9.8  | 0.5         |
|                       |    | N9-H | 6 | p | 241.7 | 120.9 | 120.9 | 0.0        | 78.4     | 45.7      | 45.7     | 0.0                  | -9.8 | 0.5         | 9.8  | 0.5         |
|                       | N6 | N2-H | 7 | p | 564.3 | 282.1 | 282.1 | 0.0        | 161.3    | 115.1     | 115.1    | 0.0                  | -9.8 | 0.6         | 9.8  | 0.6         |
|                       |    | N3-H | 7 | n | 181.8 | 91.0  | 90.7  | -0.3       | 66.3     | 40.1      | 40.3     | -0.3                 | -9.8 | 0.0         | 8.0  | -0.1        |
|                       |    | N6-H | 7 | n | 168.4 | 81.7  | 86.8  | 5.1        | 60.2     | 33.9      | 35.9     | -2.1                 | -9.8 | 0.1         | 9.8  | 0.1         |
|                       | N7 | N2-H | 7 | p | 559.0 | 279.5 | 279.5 | 0.0        | 160.9    | 114.3     | 114.3    | 0.0                  | -9.8 | 0.6         | 9.8  | 0.6         |
|                       |    | N3-H | 7 | n | 225.4 | 113.0 | 112.4 | -0.7       | 78.1     | 49.0      | 48.7     | 0.3                  | -9.8 | 0.0         | 9.8  | 0.0         |
|                       |    | N7-H | 7 | n | 524.9 | 262.3 | 262.6 | 0.3        | 149.0    | 104.9     | 105.1    | -0.1                 | -9.8 | 0.7         | 9.8  | 0.7         |
|                       | N8 | N2-H | 7 | p | 607.0 | 303.5 | 303.5 | 0.0        | 172.6    | 123.6     | 123.6    | 0.0                  | -9.8 | 0.7         | 9.8  | 0.7         |
|                       |    | N3-H | 7 | p | 559.0 | 279.5 | 279.5 | 0.0        | 160.9    | 114.3     | 114.3    | 0.0                  | -9.8 | 0.6         | 9.8  | 0.6         |
|                       |    | N8-H | 7 | n | 156.7 | 76.4  | 80.4  | 4.0        | 57.7     | 31.8      | 33.3     | -1.5                 | -9.8 | 0.1         | 9.8  | 0.1         |
|                       | N9 | N2-H | 7 | p | 545.9 | 272.9 | 272.9 | 0.0        | 156.9    | 111.6     | 111.6    | 0.0                  | -9.8 | 0.6         | 9.8  | 0.6         |
|                       |    | N3-H | 7 | p | 564.3 | 282.1 | 282.1 | 0.0        | 161.3    | 115.1     | 115.1    | 0.0                  | -9.8 | 0.6         | 9.8  | 0.6         |
|                       |    | N9-H | 7 | p | 430.7 | 215.3 | 215.3 | 0.0        | 126.0    | 86.7      | 86.7     | 0.0                  | -9.8 | 0.5         | 9.8  | 0.5         |

**Table S17.** Different NICS aromaticity indices of ring in pyrido[2,4]diazepines in the water phase. DT – diazepine type, PC - pyridine condensation type, T – tautomer type, R -ring type, P – planarity (p- planar; n- non-planar), I – integral NICS (INICS. ppm/Å), I- – integral NICS for the distances below the plane (ppm/Å), I+ – integral NICS for the distances above the plane (ppm/Å),  $\Delta I = I(-) - I(+)$  (ppm/Å); NICS(0), NICS(1), NICS(-1), and  $\Delta NICS(-1,1) = NICS(-1) - NICS(1)$  (ppm). MIN1 and MIN2 are minima of the NICS function for distances below and above the ring plane, respectively, and NICS(MIN1) and NICS(MIN2) are the NICS function values in MIN1 and MIN2.

| Water Phase           |    |      |   |   |        |       |       |            |          |           |          |                      |      |             |      |             |
|-----------------------|----|------|---|---|--------|-------|-------|------------|----------|-----------|----------|----------------------|------|-------------|------|-------------|
| DT                    | PC | T    | R | P | I      | I-    | I+    | $\Delta I$ | NICS (0) | NICS (-1) | NICS (1) | $\Delta NICS (-1,1)$ | MIN1 | NICS (MIN1) | MIN2 | NICS (MIN2) |
| pyrido[2,4]diazepines | N6 | N2-H | 6 | p | 366.5  | 183.3 | 183.3 | 0.0        | 102.3    | 67.8      | 67.8     | 0.0                  | -9.8 | 1.0         | 9.8  | 1.0         |
|                       |    | N4-H | 6 | n | 266.0  | 126.8 | 139.3 | 12.5       | 78.6     | 46.5      | 51.4     | -4.9                 | -9.8 | 0.7         | 9.8  | 0.7         |
|                       |    | N6-H | 6 | p | 258.2  | 126.9 | 131.4 | 4.5        | 84.2     | 50.0      | 51.5     | -1.5                 | -9.8 | 0.4         | 9.8  | 0.4         |
|                       |    | N2-H | 6 | p | 365.4  | 182.7 | 182.7 | 0.0        | 102.3    | 68.1      | 68.1     | 0.0                  | -9.8 | 1.0         | 9.8  | 1.0         |
|                       |    | N4-H | 6 | p | 443.0  | 221.5 | 221.5 | 0.0        | 120.4    | 82.8      | 82.8     | 0.0                  | -9.8 | 1.2         | 9.8  | 1.2         |
|                       |    | N7-H | 6 | n | 220.4  | 105.5 | 114.9 | 9.4        | 74.2     | 40.4      | 44.7     | -4.3                 | -9.8 | 0.3         | 9.8  | 0.4         |
|                       |    | N2-H | 6 | p | 443.1  | 221.5 | 221.5 | 0.0        | 120.5    | 82.8      | 82.8     | 0.0                  | -9.8 | 1.2         | 9.8  | 1.2         |
|                       |    | N4-H | 6 | p | 365.4  | 182.7 | 182.7 | 0.0        | 102.3    | 68.1      | 68.1     | 0.0                  | -9.8 | 1.0         | 9.8  | 1.0         |
|                       |    | N8-H | 6 | n | 220.4  | 105.5 | 114.9 | 9.4        | 74.2     | 40.4      | 44.7     | -4.3                 | -9.8 | 0.3         | 9.8  | 0.4         |
|                       | N9 | N2-H | 6 | n | 266.0  | 126.8 | 139.3 | 12.5       | 78.6     | 46.5      | 51.4     | -4.9                 | -9.8 | 0.7         | 9.8  | 0.7         |
|                       |    | N4-H | 6 | p | 366.6  | 183.3 | 183.3 | 0.0        | 102.3    | 67.8      | 67.8     | 0.0                  | -9.8 | 1.0         | 9.8  | 1.0         |
|                       |    | N9-H | 6 | p | 258.2  | 126.9 | 131.4 | 4.5        | 84.2     | 50.0      | 51.5     | -1.5                 | -9.8 | 0.4         | 9.8  | 0.4         |
|                       | N6 | N2-H | 7 | p | 863.0  | 431.5 | 431.5 | 0.0        | 236.7    | 173.4     | 173.4    | 0.0                  | -9.8 | 1.1         | 9.8  | 1.1         |
|                       |    | N4-H | 7 | n | 674.9  | 336.1 | 338.9 | 2.8        | 189.5    | 135.9     | 136.6    | -0.7                 | -9.8 | 0.8         | 9.8  | 0.8         |
|                       |    | N6-H | 7 | p | 352.8  | 174.7 | 178.0 | 3.3        | 105.8    | 70.3      | 70.6     | -0.3                 | -9.8 | 0.4         | 9.8  | 0.4         |
|                       | N7 | N2-H | 7 | p | 874.4  | 437.2 | 437.2 | 0.0        | 240.5    | 175.9     | 175.9    | 0.0                  | -9.8 | 1.2         | 9.8  | 1.2         |
|                       |    | N4-H | 7 | p | 1002.3 | 501.2 | 501.2 | 0.0        | 272.3    | 200.8     | 200.8    | 0.0                  | -9.8 | 1.4         | 9.8  | 1.4         |
|                       |    | N7-H | 7 | n | 333.7  | 165.4 | 168.4 | 3.0        | 101.6    | 66.9      | 67.0     | -0.2                 | -9.8 | 0.4         | 9.8  | 0.4         |
|                       | N8 | N2-H | 7 | p | 1002.5 | 501.3 | 501.3 | 0.0        | 272.3    | 200.8     | 200.8    | 0.0                  | -9.8 | 1.4         | 9.8  | 1.4         |
|                       |    | N4-H | 7 | p | 874.4  | 437.2 | 437.2 | 0.0        | 240.5    | 175.9     | 175.9    | 0.0                  | -9.8 | 1.2         | 9.8  | 1.2         |
|                       |    | N8-H | 7 | n | 333.7  | 165.4 | 168.4 | 3.0        | 101.6    | 66.9      | 67.0     | -0.2                 | -9.8 | 0.4         | 9.8  | 0.4         |
|                       | N9 | N2-H | 7 | n | 674.9  | 336.1 | 338.9 | 2.8        | 189.5    | 135.9     | 136.6    | -0.7                 | -9.8 | 0.8         | 9.8  | 0.8         |
|                       |    | N4-H | 7 | p | 862.9  | 431.5 | 431.5 | 0.0        | 236.7    | 173.4     | 173.4    | 0.0                  | -9.8 | 1.1         | 9.8  | 1.1         |
|                       |    | N9-H | 7 | p | 352.8  | 174.7 | 178.0 | 3.3        | 105.8    | 70.3      | 70.6     | -0.3                 | -9.8 | 0.4         | 9.8  | 0.4         |
